# Supplementary material for: Helveticoside is a biologically active component of the seed extract of Descurainia sophia and induces reciprocal gene regulation in A549 human lung cancer cells
Source: PubMed Central journal article supplement (PMC4575430; doi:10.1186/s12864-015-1918-1), 2015-09-18
Supplement: 12864_2015_1918_MOESM1_ESM.pdf [file 12864_2015_1918_MOESM1_ESM.pdf]

**Additional file 1. List of genes used in the Connectivity map analysis for EEDS.**

| Up-regulated genes by EEDS |           |             | Down-regulated genes by EEDS |           |             |
|----------------------------|-----------|-------------|------------------------------|-----------|-------------|
| Symbol                     | Entrez ID | Fold (Log2) | Symbol                       | Entrez ID | Fold (Log2) |
| EGR1                       | 1958      | 10.0        | HOXB13                       | 10481     | -5.0        |
| FOSB                       | 2354      | 7.8         | ST6GAL1                      | 6480      | -4.8        |
| EGR2                       | 1959      | 6.4         | GPRIN2                       | 9721      | -4.7        |
| ATF3                       | 467       | 5.6         | SALL2                        | 6297      | -4.7        |
| PPP1R15A                   | 23645     | 5.5         | CBR3                         | 874       | -4.5        |
| IL8                        | 3576      | 5.5         | FANCF                        | 2188      | -4.5        |
| MAFF                       | 23764     | 5.0         | CCR7                         | 1236      | -4.4        |
| C3orf52                    | 79669     | 4.9         | VAV3                         | 10451     | -4.3        |
| DDIT3                      | 1649      | 4.9         | C14orf93                     | 60686     | -4.3        |
| FOS                        | 2353      | 4.8         | NTHL1                        | 4913      | -4.3        |
| LTB                        | 4050      | 4.8         | VASH1                        | 22846     | -4.2        |
| GADD45B                    | 4616      | 4.8         | TCEA2                        | 6919      | -4.2        |
| ARC                        | 23237     | 4.7         | HSPA8                        | 3312      | -4.2        |
| PER1                       | 5187      | 4.6         | B4GALNT1                     | 2583      | -4.1        |
| SERPINE1                   | 5054      | 4.5         | DIXDC1                       | 85458     | -4.0        |
| HBEGF                      | 1839      | 4.4         | NUDT18                       | 79873     | -4.0        |
| TNFAIP3                    | 7128      | 4.3         | SYT17                        | 51760     | -4.0        |
| FOSL1                      | 8061      | 4.3         | ACOX2                        | 8309      | -3.9        |
| LCAT                       | 3931      | 4.3         | C3orf18                      | 51161     | -3.9        |
| DLX2                       | 1746      | 4.2         | SMO                          | 6608      | -3.8        |
| KLF4                       | 9314      | 4.1         | ELAC1                        | 55520     | -3.8        |
| GREM1                      | 26585     | 4.1         | NNMT                         | 4837      | -3.8        |
| BIRC3                      | 330       | 4.1         | MAGEH1                       | 28986     | -3.7        |
| C10orf110                  | 55853     | 4.0         | BCAS1                        | 8537      | -3.7        |
| AOC3                       | 8639      | 4.0         | CNPY2                        | 10330     | -3.7        |
| GADD45A                    | 1647      | 4.0         | MAP2K6                       | 5608      | -3.6        |
| KDM6B                      | 23135     | 3.9         | MTMR4                        | 9110      | -3.6        |

|           |       |     |           |        |      |
|-----------|-------|-----|-----------|--------|------|
| CYR61     | 3491  | 3.8 | KRCC1     | 51315  | -3.6 |
| STX3      | 6809  | 3.8 | SETBP1    | 26040  | -3.5 |
| EREG      | 2069  | 3.8 | FHOD3     | 80206  | -3.5 |
| DNAJB2    | 3300  | 3.8 | B3GALT4   | 8705   | -3.5 |
| CYP1A1    | 1543  | 3.7 | HGD       | 3081   | -3.5 |
| PDGFB     | 5155  | 3.7 | EHMT2     | 10919  | -3.4 |
| CSF2      | 1437  | 3.7 | THNSL1    | 79896  | -3.4 |
| UGCG      | 7357  | 3.7 | PDE8B     | 8622   | -3.4 |
| DAAM1     | 23002 | 3.6 | EPB41L4A  | 64097  | -3.4 |
| EDN2      | 1907  | 3.6 | HPS6      | 79803  | -3.4 |
| AEN       | 64782 | 3.6 | TST       | 7263   | -3.3 |
| MCTP1     | 79772 | 3.6 | HS3ST1    | 9957   | -3.3 |
| RASSF1    | 11186 | 3.6 | CTDSPL    | 10217  | -3.2 |
| NFKBIE    | 4794  | 3.6 | MANSC1    | 54682  | -3.2 |
| TNFRSF12A | 51330 | 3.5 | SMARCAL1  | 50485  | -3.2 |
| SMOX      | 54498 | 3.5 | PIK3C2B   | 5287   | -3.2 |
| MAP3K14   | 9020  | 3.5 | IDH1      | 3417   | -3.2 |
| GEM       | 2669  | 3.5 | PDE7B     | 27115  | -3.2 |
| MXD1      | 4084  | 3.4 | DOK1      | 1796   | -3.2 |
| CCL20     | 6364  | 3.4 | RHOBTB1   | 9886   | -3.2 |
| CCRN4L    | 25819 | 3.4 | PBX1      | 5087   | -3.2 |
| ASMT      | 438   | 3.4 | MORC4     | 79710  | -3.2 |
| PLA2G4C   | 8605  | 3.4 | C17orf108 | 201229 | -3.2 |
| BBC3      | 27113 | 3.3 | ADAT1     | 23536  | -3.1 |
| AREG      | 374   | 3.3 | RNF43     | 54894  | -3.1 |
| IL11      | 3589  | 3.3 | KCNJ6     | 3763   | -3.1 |
| ETS1      | 2113  | 3.3 | ZC4H2     | 55906  | -3.1 |
| JUN       | 3725  | 3.3 | SYT12     | 91683  | -3.1 |
| BTG2      | 7832  | 3.3 | ZNF362    | 149076 | -3.1 |
| TXNL4B    | 54957 | 3.3 | TRIM45    | 80263  | -3.0 |
| ANKRD1    | 27063 | 3.3 | CAPN5     | 726    | -3.0 |

|           |        |     |          |        |      |
|-----------|--------|-----|----------|--------|------|
| TMEM156   | 80008  | 3.3 | MGAT3    | 4248   | -3.0 |
| EPHA2     | 1969   | 3.3 | PCYT2    | 5833   | -3.0 |
| HAS2      | 3037   | 3.2 | ABCA3    | 21     | -3.0 |
| ADM       | 133    | 3.2 | PLCD1    | 5333   | -3.0 |
| CDKN1A    | 1026   | 3.2 | HSPA2    | 3306   | -3.0 |
| SOCS3     | 9021   | 3.2 | PRIM1    | 5557   | -2.9 |
| TNFRSF10D | 8793   | 3.1 | ZNF32    | 7580   | -2.9 |
| OXTR      | 5021   | 3.1 | DENND2D  | 79961  | -2.9 |
| NFKB2     | 4791   | 3.1 | LARGE    | 9215   | -2.9 |
| DUSP10    | 11221  | 3.1 | LXN      | 56925  | -2.9 |
| C1orf69   | 200205 | 3.1 | SNPH     | 9751   | -2.9 |
| FAM193B   | 54540  | 3.0 | RASSF4   | 83937  | -2.9 |
| LOC157562 | 157562 | 3.0 | THYN1    | 29087  | -2.9 |
| CCNL1     | 57018  | 3.0 | FAM55C   | 91775  | -2.8 |
| C19orf61  | 56006  | 3.0 | LRRC20   | 55222  | -2.8 |
| ARID3B    | 10620  | 3.0 | SLC24A6  | 80024  | -2.8 |
| SDC4      | 6385   | 3.0 | NUDT7    | 283927 | -2.8 |
| MAPK8IP3  | 23162  | 3.0 | PNMAL1   | 55228  | -2.8 |
| GABARAPL1 | 23710  | 3.0 | FAM134B  | 54463  | -2.8 |
| KPNA5     | 3841   | 3.0 | GOLSYN   | 55638  | -2.8 |
| IL1RAP    | 3556   | 3.0 | C16orf42 | 115939 | -2.8 |
| EMP1      | 2012   | 2.9 | CYB5B    | 80777  | -2.8 |
| THAP3     | 90326  | 2.9 | GNAZ     | 2781   | -2.8 |
| CXCL1     | 2919   | 2.9 | GMPPA    | 29926  | -2.8 |
| ADRB2     | 154    | 2.9 | KIAA0485 | 57235  | -2.8 |
| TRAF1     | 7185   | 2.9 | PRMT7    | 54496  | -2.7 |
| CTSK      | 1513   | 2.9 | C16orf59 | 80178  | -2.7 |
| TBX21     | 30009  | 2.9 | HOXA6    | 3203   | -2.7 |
| CTGF      | 1490   | 2.9 | C5orf54  | 63920  | -2.7 |
| CLCF1     | 23529  | 2.9 | FBXO4    | 26272  | -2.7 |
| IL32      | 9235   | 2.9 | STAT6    | 6778   | -2.7 |

|           |        |     |         |        |      |
|-----------|--------|-----|---------|--------|------|
| LYST      | 1130   | 2.8 | GPR162  | 27239  | -2.7 |
| KLF10     | 7071   | 2.8 | THAP7   | 80764  | -2.7 |
| GATA6     | 2627   | 2.8 | JMJD4   | 65094  | -2.7 |
| SERPINB8  | 5271   | 2.8 | SYTL2   | 54843  | -2.7 |
| RIT1      | 6016   | 2.8 | ARRB1   | 408    | -2.6 |
| REL       | 5966   | 2.8 | CYP2U1  | 113612 | -2.6 |
| RSRC2     | 65117  | 2.8 | RGL1    | 23179  | -2.6 |
| FOXD1     | 2297   | 2.8 | HOXC4   | 3221   | -2.6 |
| RUNX1     | 861    | 2.8 | SLC22A3 | 6581   | -2.6 |
| PLK3      | 1263   | 2.8 | CBR1    | 873    | -2.6 |
| NFKBIB    | 4793   | 2.8 | GEMIN6  | 79833  | -2.6 |
| MAP2K3    | 5606   | 2.8 | KHK     | 3795   | -2.6 |
| PTHLH     | 5744   | 2.8 | ADRA1D  | 146    | -2.6 |
| ZNF484    | 83744  | 2.8 | IL22RA1 | 58985  | -2.6 |
| NAB2      | 4665   | 2.7 | MYLK    | 4638   | -2.6 |
| RELB      | 5971   | 2.7 | USP9X   | 8239   | -2.6 |
| CRY1      | 1407   | 2.7 | CCDC106 | 29903  | -2.6 |
| ZNF136    | 7695   | 2.7 | IFIT1   | 3434   | -2.6 |
| JUNB      | 3726   | 2.7 | SAC3D1  | 29901  | -2.5 |
| PPP1R13L  | 10848  | 2.7 | ZMYND8  | 23613  | -2.5 |
| STK19     | 8859   | 2.7 | MIIP    | 60672  | -2.5 |
| C14orf138 | 79609  | 2.7 | MUTYH   | 4595   | -2.5 |
| RSC1A1    | 6248   | 2.7 | LCMT2   | 9836   | -2.5 |
| ARHGAP19  | 84986  | 2.7 | MSTO1   | 55154  | -2.5 |
| LIF       | 3976   | 2.6 | TRADD   | 8717   | -2.5 |
| STC1      | 6781   | 2.6 | APBA2   | 321    | -2.5 |
| IGF2BP2   | 10644  | 2.6 | BFSP1   | 631    | -2.5 |
| YRDC      | 79693  | 2.6 | RNASEL  | 6041   | -2.5 |
| IFRD1     | 3475   | 2.6 | HS6ST1  | 9394   | -2.5 |
| JMJD1C    | 221037 | 2.6 | DET1    | 55070  | -2.5 |
| TAF1A     | 9015   | 2.6 | IMPA2   | 3613   | -2.5 |

|           |        |     |         |        |      |
|-----------|--------|-----|---------|--------|------|
| TLE4      | 7091   | 2.6 | USP18   | 11274  | -2.5 |
| POFUT2    | 23275  | 2.6 | PRKCDBP | 112464 | -2.5 |
| OVGP1     | 5016   | 2.6 | MTUS1   | 57509  | -2.5 |
| PKP2      | 5318   | 2.6 | MAGED4B | 81557  | -2.5 |
| C10orf118 | 55088  | 2.6 | LRFN3   | 79414  | -2.5 |
| SLC19A2   | 10560  | 2.6 | ZNF232  | 7775   | -2.5 |
| ELL       | 8178   | 2.6 | FAM102A | 399665 | -2.5 |
| PPM1D     | 8493   | 2.6 | RIBC2   | 26150  | -2.5 |
| RLF       | 6018   | 2.6 | C7orf68 | 29923  | -2.5 |
| CHD2      | 1106   | 2.6 | RHOBTB2 | 23221  | -2.5 |
| UPF3B     | 65109  | 2.6 | EHD3    | 30845  | -2.5 |
| PFKFB4    | 5210   | 2.6 | FZD4    | 8322   | -2.4 |
| IER5      | 51278  | 2.5 | QARS    | 5859   | -2.4 |
| GUCA1B    | 2979   | 2.5 | PYCARD  | 29108  | -2.4 |
| HRK       | 8739   | 2.5 | AZI1    | 22994  | -2.4 |
| CCNT2     | 905    | 2.5 | FUT8    | 2530   | -2.4 |
| FBXL12    | 54850  | 2.5 | OSBPL7  | 114881 | -2.4 |
| STARD13   | 90627  | 2.5 | HPGD    | 3248   | -2.4 |
| DOHH      | 83475  | 2.5 | RDBP    | 7936   | -2.4 |
| SLMO1     | 10650  | 2.5 | KRT4    | 3851   | -2.4 |
| TICAM1    | 148022 | 2.5 | ATP13A2 | 23400  | -2.4 |
| ZNF654    | 55279  | 2.5 | CFB     | 629    | -2.4 |
| EFNA1     | 1942   | 2.5 | TBC1D16 | 125058 | -2.4 |
| GJB3      | 2707   | 2.5 | FBXO9   | 26268  | -2.4 |
| CDKN2AIP  | 55602  | 2.5 | NDRG3   | 57446  | -2.4 |
| DUSP1     | 1843   | 2.5 | HEATR3  | 55027  | -2.4 |
| ZNF143    | 7702   | 2.5 | SPATA7  | 55812  | -2.4 |
| IER2      | 9592   | 2.5 | MMP15   | 4324   | -2.4 |
| TUBA4A    | 7277   | 2.5 | PIR     | 8544   | -2.4 |
| KLHL28    | 54813  | 2.5 | MPI     | 4351   | -2.4 |
| PRDM1     | 639    | 2.4 | TTC12   | 54970  | -2.4 |

|         |        |     |           |        |      |
|---------|--------|-----|-----------|--------|------|
| ACVR2A  | 92     | 2.4 | DPYSL3    | 1809   | -2.4 |
| ZNF335  | 63925  | 2.4 | KCNMB4    | 27345  | -2.3 |
| PI4K2A  | 55361  | 2.4 | TLL1      | 25809  | -2.3 |
| ID2     | 3398   | 2.4 | SIDT2     | 51092  | -2.3 |
| PRPF39  | 55015  | 2.4 | IMPACT    | 55364  | -2.3 |
| FERMT2  | 10979  | 2.4 | MAP4K2    | 5871   | -2.3 |
| GADD45G | 10912  | 2.4 | FCHO1     | 23149  | -2.3 |
| KLF6    | 1316   | 2.4 | LOC644450 | 644450 | -2.3 |
| MORC3   | 23515  | 2.4 | UBAC1     | 10422  | -2.3 |
| TUBA8   | 51807  | 2.4 | TENC1     | 23371  | -2.3 |
| VEGFA   | 7422   | 2.4 | TREX1     | 11277  | -2.3 |
| EFNB2   | 1948   | 2.4 | PTPN18    | 26469  | -2.3 |
| MOSPD1  | 56180  | 2.4 | RBBP9     | 10741  | -2.3 |
| GPLY    | 10578  | 2.4 | MYH10     | 4628   | -2.3 |
| C6orf35 | 729515 | 2.4 | RGS14     | 10636  | -2.3 |
| RBBP6   | 5930   | 2.4 | PLCH1     | 23007  | -2.3 |
| GDF15   | 9518   | 2.4 | SLC9A3R2  | 9351   | -2.3 |
| RRAD    | 6236   | 2.4 | APITD1    | 378708 | -2.3 |
| DDX3Y   | 8653   | 2.4 | CPOX      | 1371   | -2.3 |
| TUBA3C  | 7278   | 2.4 | ZDHHC6    | 64429  | -2.3 |
| CRY2    | 1408   | 2.4 | PACS2     | 23241  | -2.3 |
| TOP1    | 7150   | 2.4 | RPL23AP32 | 56969  | -2.3 |
| NFAT5   | 10725  | 2.4 | INTS3     | 65123  | -2.3 |
| CCKBR   | 887    | 2.4 | NRG2      | 9542   | -2.3 |
| ROR1    | 4919   | 2.4 | NT5M      | 56953  | -2.3 |
| CLDN1   | 9076   | 2.4 | ITPKB     | 3707   | -2.3 |
| SSH1    | 54434  | 2.4 | RSAD1     | 55316  | -2.2 |
| C1orf63 | 57035  | 2.4 | PTDSS1    | 9791   | -2.2 |
| TERF2IP | 54386  | 2.4 | NAT1      | 9      | -2.2 |
| FOXD3   | 27022  | 2.3 | NEURL     | 9148   | -2.2 |
| TUFT1   | 7286   | 2.3 | PIK3R2    | 5296   | -2.2 |

|           |        |     |          |        |      |
|-----------|--------|-----|----------|--------|------|
| ABL2      | 27     | 2.3 | SUOX     | 6821   | -2.2 |
| ID4       | 3400   | 2.3 | RGS10    | 6001   | -2.2 |
| TNFRSF10B | 8795   | 2.3 | ZNF839   | 55778  | -2.2 |
| OTUD3     | 23252  | 2.3 | RGS19    | 10287  | -2.2 |
| GPRC5B    | 51704  | 2.3 | MPST     | 4357   | -2.2 |
| KIAA0895  | 23366  | 2.3 | PCYOX1L  | 78991  | -2.2 |
| AKAP12    | 9590   | 2.3 | ACADSB   | 36     | -2.2 |
| HMGCS1    | 3157   | 2.3 | MRPS34   | 65993  | -2.2 |
| CRABP2    | 1382   | 2.3 | CUL9     | 23113  | -2.2 |
| PIM1      | 5292   | 2.3 | GSDMD    | 79792  | -2.2 |
| HIVEP1    | 3096   | 2.3 | GAB2     | 9846   | -2.2 |
| RHBDF1    | 64285  | 2.3 | FLJ11710 | 79904  | -2.2 |
| STRN3     | 29966  | 2.3 | KAT2A    | 2648   | -2.2 |
| TSC22D2   | 9819   | 2.3 | TUB      | 7275   | -2.2 |
| AMOTL2    | 51421  | 2.3 | DGKG     | 1608   | -2.2 |
| ARID3A    | 1820   | 2.3 | LHX2     | 9355   | -2.2 |
| SLC35F2   | 54733  | 2.3 | TMEM143  | 55260  | -2.2 |
| SLC7A6    | 9057   | 2.3 | PDCD2    | 5134   | -2.2 |
| VPS37B    | 79720  | 2.3 | FERMT1   | 55612  | -2.2 |
| ZFP36     | 7538   | 2.3 | FLJ11235 | 54508  | -2.2 |
| C1GALT1   | 56913  | 2.3 | DOK4     | 55715  | -2.2 |
| BTG1      | 694    | 2.3 | ARHGEF9  | 23229  | -2.2 |
| LONRF3    | 79836  | 2.2 | F12      | 2161   | -2.1 |
| CPEB3     | 22849  | 2.2 | UBE2D4   | 51619  | -2.1 |
| ZNF529    | 57711  | 2.2 | C8orf55  | 51337  | -2.1 |
| CDC42SE1  | 56882  | 2.2 | RWDD2B   | 10069  | -2.1 |
| IRF1      | 3659   | 2.2 | PLD2     | 5338   | -2.1 |
| NR1D2     | 9975   | 2.2 | TUBBP5   | 643224 | -2.1 |
| THAP9     | 79725  | 2.2 | KIAA0100 | 9703   | -2.1 |
| DUSP6     | 1848   | 2.2 | RAB15    | 376267 | -2.1 |
| NEK7      | 140609 | 2.2 | ZCWPW1   | 55063  | -2.1 |

|          |        |     |           |        |      |
|----------|--------|-----|-----------|--------|------|
| SCML2    | 10389  | 2.2 | TMC5      | 79838  | -2.1 |
| PRKAB1   | 5564   | 2.2 | OSBPL1A   | 114876 | -2.1 |
| GABPB1   | 2553   | 2.2 | TBCD      | 6904   | -2.1 |
| CXCL3    | 2921   | 2.2 | NARG2     | 79664  | -2.1 |
| C6orf145 | 221749 | 2.2 | CLDN3     | 1365   | -2.1 |
| CHIC2    | 26511  | 2.2 | AMDHD2    | 51005  | -2.1 |
| TEF      | 7008   | 2.2 | F8A1      | 8263   | -2.1 |
| THAP1    | 55145  | 2.2 | GALNT4    | 8693   | -2.1 |
| UNC84B   | 25777  | 2.2 | WDR4      | 10785  | -2.1 |
| F3       | 2152   | 2.2 | C19orf54  | 284325 | -2.1 |
| MAFK     | 7975   | 2.2 | GIN54     | 84296  | -2.1 |
| SKIL     | 6498   | 2.2 | FANCG     | 2189   | -2.1 |
| UFM1     | 51569  | 2.2 | ARHGAP22  | 58504  | -2.1 |
| NPR2     | 4882   | 2.2 | BDH1      | 622    | -2.1 |
| CAPRIN2  | 65981  | 2.2 | XRCC1     | 7515   | -2.1 |
| RFPL3S   | 10737  | 2.2 | SMARCD3   | 6604   | -2.1 |
| SNIP1    | 79753  | 2.2 | ANXA4     | 307    | -2.1 |
| FST      | 10468  | 2.2 | CDON      | 50937  | -2.1 |
| PPL      | 5493   | 2.2 | CCDC71    | 64925  | -2.1 |
| PVR      | 5817   | 2.2 | MLPH      | 79083  | -2.1 |
| ZCCHC6   | 79670  | 2.2 | ETV6      | 2120   | -2.1 |
| ZEB2     | 9839   | 2.1 | C8orf51   | 78998  | -2.1 |
| TLR6     | 10333  | 2.1 | C14orf133 | 63894  | -2.1 |
| ZNF460   | 10794  | 2.1 | HOXB5     | 3215   | -2.1 |
| IP6K2    | 51447  | 2.1 | ZNF358    | 140467 | -2.1 |
| LINS1    | 55180  | 2.1 | ANKRD36B  | 57730  | -2.1 |
| REV1     | 51455  | 2.1 | P2RY6     | 5031   | -2.0 |
| SLC38A2  | 54407  | 2.1 | PNPO      | 55163  | -2.0 |
| IKZF5    | 64376  | 2.1 | ADCK2     | 90956  | -2.0 |
| CXCL2    | 2920   | 2.1 | CASP6     | 839    | -2.0 |
| CREB5    | 9586   | 2.1 | ECHDC2    | 55268  | -2.0 |



|            |        |     |          |        |      |
|------------|--------|-----|----------|--------|------|
| CLK4       | 57396  | 2.1 | C22orf36 | 388886 | -2.0 |
| CLK1       | 1195   | 2.1 | MAB21L2  | 10586  | -2.0 |
| TNNC2      | 7125   | 2.1 | RPP40    | 10799  | -2.0 |
| DCP1A      | 55802  | 2.1 | MAP2K5   | 5607   | -2.0 |
| TBC1D15    | 64786  | 2.1 | ABCA7    | 10347  | -2.0 |
| WDR47      | 22911  | 2.1 | HMBS     | 3145   | -2.0 |
| RIOK3      | 8780   | 2.1 | ARHGAP26 | 23092  | -2.0 |
| ABTB2      | 25841  | 2.1 | RAD51L3  | 5892   | -2.0 |
| HTR1A      | 3350   | 2.1 | CHST12   | 55501  | -2.0 |
| FGFR1OP    | 11116  | 2.1 | METTL13  | 51603  | -2.0 |
| SMURF2     | 64750  | 2.1 | EIF2B3   | 8891   | -2.0 |
| TNFRSF9    | 3604   | 2.1 | MAPT     | 4137   | -2.0 |
| DDX10      | 1662   | 2.1 | LIG1     | 3978   | -2.0 |
| CSGALNACT2 | 55454  | 2.1 | IMPDH2   | 3615   | -2.0 |
| VNN2       | 8875   | 2.0 | PDK2     | 5164   | -2.0 |
| WBP4       | 11193  | 2.0 | PALB2    | 79728  | -2.0 |
| CTNNAL1    | 8727   | 2.0 | C9orf125 | 84302  | -2.0 |
| DCP2       | 167227 | 2.0 | MPP2     | 4355   | -2.0 |
| TDG        | 6996   | 2.0 | B9D1     | 27077  | -2.0 |
| FSTL3      | 10272  | 2.0 | MREG     | 55686  | -2.0 |
| YOD1       | 55432  | 2.0 | ALX1     | 8092   | -2.0 |
| ATAD2B     | 54454  | 2.0 | QDPR     | 5860   | -2.0 |
| CDCA4      | 55038  | 2.0 | UROS     | 7390   | -2.0 |
| HIC2       | 23119  | 2.0 | PTPRA    | 5786   | -2.0 |
| KIRREL     | 55243  | 2.0 | JUP      | 3728   | -2.0 |
| BTN2A1     | 11120  | 2.0 | POP5     | 51367  | -2.0 |
| PRPF38B    | 55119  | 2.0 | ZNF688   | 146542 | -2.0 |
| MTSS1L     | 92154  | 2.0 | AMACR    | 23600  | -2.0 |
| JHDM1D     | 80853  | 2.0 | N6AMT1   | 29104  | -2.0 |
| STX1A      | 6804   | 2.0 | RFX5     | 5993   | -2.0 |
| SEMA3C     | 10512  | 2.0 | MUC5B    | 727897 | -2.0 |

|          |       |     |
|----------|-------|-----|
| TBC1D22B | 55633 | 2.0 |
| THUMPD2  | 80745 | 2.0 |
| SGPP1    | 81537 | 2.0 |
| FBXO3    | 26273 | 2.0 |
| CCNL2    | 81669 | 2.0 |
| EGFR     | 1956  | 2.0 |
| TNFAIP2  | 7127  | 2.0 |
| COQ10B   | 80219 | 2.0 |
| CCNH     | 902   | 2.0 |
| SYNJ1    | 8867  | 2.0 |
| GOLGA8A  | 23015 | 2.0 |
| SMG5     | 23381 | 2.0 |
| TIPARP   | 25976 | 2.0 |
| FBXW7    | 55294 | 2.0 |
| BCL10    | 8915  | 2.0 |
| RAGE     | 5891  | 2.0 |
| ZBTB11   | 27107 | 2.0 |
| INTS6    | 26512 | 2.0 |

---
