# Supplementary material for: Helveticoside is a biologically active component of the seed extract of Descurainia sophia and induces reciprocal gene regulation in A549 human lung cancer cells
Source: PubMed Central journal article supplement (PMC4575430; doi:10.1186/s12864-015-1918-1), 2015-09-18
Supplement: 12864_2015_1918_MOESM2_ESM.pdf [file 12864_2015_1918_MOESM2_ESM.pdf]

**Additional file 2. Full list of genes in each pattern after treatment with helveticoside.**

| Down-regulated pattern |        |                    |       |       | Up-regulated pattern |        |                    |      |      |
|------------------------|--------|--------------------|-------|-------|----------------------|--------|--------------------|------|------|
| Symbol                 | GeneID | Helveticoside (nM) |       |       | Symbol               | GeneID | Helveticoside (nM) |      |      |
|                        |        | 3.75               | 15    | 60    |                      |        | 3.75               | 15   | 60   |
| CLDN2                  | 9075   | -0.11              | -2.71 | -4.41 | EGR1                 | 1958   | 1.17               | 2.03 | 6.28 |
| HSPA8                  | 3312   | -1.2               | -3.27 | -4.12 | GADD45B              | 4616   | 0.55               | 1.21 | 4.31 |
| CSRP2BP                | 57325  | -1.26              | -2.11 | -3.9  | SMOX                 | 54498  | 2.94               | 3.47 | 4.14 |
| MFSD3                  | 113655 | -0.08              | -0.86 | -3.86 | CYR61                | 3491   | 0.79               | 1.7  | 4.1  |
| NNMT                   | 4837   | 0.01               | -1.82 | -3.66 | IL8                  | 3576   | 1.07               | 2.41 | 4.02 |
| SCARA5                 | 286133 | 0.08               | -1.22 | -3.62 | IL11                 | 3589   | 0.47               | 1.92 | 3.81 |
| HLA-DMB                | 3109   | 0.1                | -0.71 | -3.59 | PPP1R15A             | 23645  | 0.53               | 1.56 | 3.7  |
| GPRIN2                 | 9721   | -1.78              | -2.86 | -3.52 | MAFF                 | 23764  | 0.8                | 1.96 | 3.67 |
| HEXIM2                 | 124790 | -0.24              | -1.38 | -3.48 | FOSB                 | 2354   | -0.04              | 0.61 | 3.51 |
| TMEM37                 | 140738 | -0.07              | -2.06 | -3.47 | C3ORF52              | 79669  | 0.46               | 1.23 | 3.42 |
| GPX2                   | 2877   | -0.01              | -2    | -3.46 | LY6K                 | 54742  | 0.62               | 2.5  | 3.37 |
| NTHL1                  | 4913   | -0.22              | -1.38 | -3.45 | GADD45A              | 1647   | -0.13              | 1.09 | 3.36 |
| CNPY2                  | 10330  | -0.68              | -1.51 | -3.42 | FOSL1                | 8061   | 0.58               | 1.61 | 3.36 |
| BAAT                   | 570    | -0.86              | -2.53 | -3.39 | EREG                 | 2069   | 1.13               | 2.42 | 3.31 |
| MORC4                  | 79710  | -0.71              | -2.07 | -3.32 | BIRC3                | 330    | 1.14               | 2.29 | 3.29 |
| B4GALNT1               | 2583   | -0.67              | -2.48 | -3.31 | LOC387763            | 387763 | 1.37               | 2.13 | 3.24 |
| FOXS1                  | 2307   | 0.79               | -1.18 | -3.18 | EMP1                 | 2012   | 0.81               | 2.39 | 3.19 |
| HSPA1A                 | 3303   | -1.01              | -2.55 | -3.15 | ADM                  | 133    | -0.2               | 0.85 | 3.13 |
| SMO                    | 6608   | -0.39              | -1.73 | -3.14 | GREM1                | 26585  | 0.5                | 1.47 | 3.13 |
| HOXB13                 | 10481  | 0.1                | -1.22 | -3.09 | SERPINE1             | 5054   | 0.09               | 1.57 | 3.11 |
| LXN                    | 56925  | -0.38              | -1.75 | -3.05 | C1ORF133             | 574036 | 0.73               | 2    | 3.04 |
| LOC285178              | 285178 | -1.39              | -2.5  | -3.03 | CD274                | 29126  | 0.71               | 1.65 | 3.04 |
| HSPA2                  | 3306   | -0.29              | -2.21 | -3.01 | DNAJB2               | 3300   | 0.01               | 1.56 | 3.03 |
| C20ORF94               | 128710 | -1                 | -1.71 | -3    | RASSF1               | 11186  | 0.21               | 1.57 | 2.98 |
| NICN1                  | 84276  | -0.27              | -1.38 | -2.99 | IRAK2                | 3656   | 1.09               | 1.81 | 2.98 |
| C3ORF18                | 51161  | -0.38              | -1.89 | -2.94 | GEM                  | 2669   | 1.33               | 1.63 | 2.96 |

|           |        |       |       |       |           |        |       |      |      |
|-----------|--------|-------|-------|-------|-----------|--------|-------|------|------|
| SALL2     | 6297   | -0.74 | -1.95 | -2.93 | CTGF      | 1490   | 0.26  | 1.37 | 2.94 |
| ACOX2     | 8309   | 0.21  | -1.6  | -2.86 | UGCG      | 7357   | 0.77  | 1.26 | 2.89 |
| RIMBP3    | 85376  | -1.45 | -1.73 | -2.86 | BBC3      | 27113  | 0.84  | 2.16 | 2.89 |
| MARVELD1  | 83742  | -0.26 | -1.45 | -2.85 | GABARAPL1 | 23710  | 0.45  | 1.76 | 2.87 |
| EEF2K     | 29904  | -1.13 | -2.06 | -2.83 | NOG       | 9241   | 0.01  | 1.37 | 2.87 |
| TST       | 7263   | -0.22 | -1.38 | -2.78 | MAP3K14   | 9020   | -0.28 | 1.41 | 2.83 |
| MTMR4     | 9110   | -0.68 | -1.34 | -2.77 | RELB      | 5971   | 0.96  | 1.97 | 2.83 |
| HPS6      | 79803  | -0.46 | -1.48 | -2.72 | DUSP1     | 1843   | 0.78  | 1.68 | 2.82 |
| LOC645249 | 645249 | -0.51 | -1.57 | -2.72 | AREG      | 374    | 0.84  | 2    | 2.75 |
| IDH1      | 3417   | -0.11 | -0.72 | -2.7  | SDC4      | 6385   | 0.5   | 1.62 | 2.72 |
| NUDT18    | 79873  | -0.48 | -1.71 | -2.7  | PPP1R13L  | 10848  | 0.13  | 1.08 | 2.69 |
| C12ORF27  | 283460 | -0.37 | -1.86 | -2.69 | AEN       | 64782  | 0.64  | 1.58 | 2.69 |
| EPHX2     | 2053   | 0.03  | -1.7  | -2.68 | VASN      | 114990 | 0.98  | 1.71 | 2.69 |
| SNORA12   | 677800 | -0.96 | -2.32 | -2.68 | PER1      | 5187   | 1.72  | 1.33 | 2.68 |
| BCAS1     | 8537   | -0.08 | -1.71 | -2.67 | SOCS3     | 9021   | 1.39  | 1.52 | 2.68 |
| ST6GAL1   | 6480   | -0.43 | -1.63 | -2.64 | C5ORF41   | 153222 | 0.81  | 1.94 | 2.65 |
| GABRB3    | 2562   | -0.13 | -1.45 | -2.64 | ARL5B     | 221079 | 0.17  | 0.7  | 2.63 |
| PNMAL1    | 55228  | -0.79 | -1.73 | -2.63 | JUN       | 3725   | 0.69  | 1.47 | 2.59 |
| SDSL      | 113675 | -0.08 | -1.01 | -2.62 | CSRNP1    | 64651  | 0.84  | 1.29 | 2.59 |
| CDNF      | 441549 | -2.03 | -2.2  | -2.61 | NFKBIE    | 4794   | -0.06 | 0.87 | 2.58 |
| HSPA1B    | 3304   | -0.84 | -2.28 | -2.59 | GOLT1A    | 127845 | 0.18  | 1.64 | 2.58 |
| LOC400099 | 400099 | -0.56 | -1.41 | -2.59 | NIPAL4    | 348938 | 0.24  | 1.62 | 2.57 |
| CTDSPL    | 10217  | -0.52 | -1.13 | -2.58 | PAGE2     | 203569 | 0.72  | 0.83 | 2.57 |
| FANCF     | 2188   | -0.74 | -1.1  | -2.58 | EPHA2     | 1969   | 0.74  | 1.51 | 2.56 |
| HPGD      | 3248   | -0.08 | -1.3  | -2.57 | ZNF341    | 84905  | 0.92  | 1.8  | 2.56 |
| DACT2     | 168002 | -1.02 | -2.13 | -2.57 | RHCG      | 51458  | 0.96  | 2.41 | 2.54 |
| CBR3      | 874    | -0.59 | -1.79 | -2.55 | FOXD1     | 2297   | 0.3   | 1.06 | 2.53 |
| CCDC106   | 29903  | -0.15 | -1.3  | -2.55 | TNFRSF10A | 8797   | 0.45  | 1.63 | 2.52 |
| TRIM16L   | 147166 | -0.89 | -1.3  | -2.55 | SERTAD1   | 29950  | 0.82  | 0.93 | 2.52 |
| TCEA2     | 6919   | -0.19 | -1.34 | -2.54 | CLDN1     | 9076   | 0.21  | 1.45 | 2.5  |
| C1QTNF6   | 114904 | 0.32  | -0.9  | -2.54 | PIM1      | 5292   | 0.56  | 1.43 | 2.49 |

|              |           |       |       |       |           |        |       |      |      |
|--------------|-----------|-------|-------|-------|-----------|--------|-------|------|------|
| FBXO16       | 157574    | -0.77 | -1.64 | -2.52 | PIM3      | 415116 | 0.9   | 1.45 | 2.49 |
| HEXDC        | 284004    | -0.61 | -1.37 | -2.52 | FST       | 10468  | 0.59  | 2.09 | 2.48 |
| HCG_2003663  | 728061    | -0.21 | -1.38 | -2.5  | TXNIP     | 10628  | 0.58  | 1.78 | 2.46 |
| C14ORF93     | 60686     | 0.06  | -1.1  | -2.44 | EDN2      | 1907   | 0.37  | 1.21 | 2.44 |
| FBXO9        | 26268     | -1.17 | -2    | -2.43 | PTHLH     | 5744   | 1.4   | 1.59 | 2.42 |
| QARS         | 5859      | -0.03 | -0.79 | -2.43 | TNFRSF10D | 8793   | 1.13  | 2.2  | 2.42 |
| ABCA3        | 21        | -0.25 | -1.33 | -2.4  | TUBA8     | 51807  | 0.36  | 1.37 | 2.42 |
| NCRNA00094   | 266655    | -0.9  | -2.18 | -2.39 | NUAK2     | 81788  | 0.21  | 0.47 | 2.41 |
| C3ORF31      | 132001    | 0     | -1.07 | -2.39 | TUBA3C    | 7278   | 0.32  | 1.32 | 2.4  |
| THSD7A       | 221981    | -0.21 | -1.56 | -2.38 | LCAT      | 3931   | 0.13  | 0.98 | 2.39 |
| C17ORF97     | 400566    | -0.46 | -1.84 | -2.38 | REM2      | 161253 | 0.37  | 1.34 | 2.38 |
| B3GALT6      | 126792    | -0.36 | -0.85 | -2.38 | ATF3      | 467    | 0.48  | 1.45 | 2.37 |
| SMARCAL1     | 50485     | -0.68 | -1.2  | -2.36 | KDM6B     | 23135  | 0.38  | 1.3  | 2.37 |
| JMJD4        | 65094     | -1.94 | -1.97 | -2.36 | TUBA4A    | 7277   | 0.26  | 1.25 | 2.36 |
| HNRNPA1L2    | 144983    | -0.09 | -1.05 | -2.36 | SLC38A2   | 54407  | 0.88  | 1.66 | 2.35 |
| SYT17        | 51760     | -0.53 | -1.23 | -2.35 | TMEM156   | 80008  | 0.47  | 1.32 | 2.34 |
| SELENBP1     | 8991      | 0.01  | -1.72 | -2.34 | AMOTL2    | 51421  | 0.21  | 1.48 | 2.33 |
| PGD          | 5226      | -0.16 | -1.17 | -2.33 | B3GNT5    | 84002  | 0.27  | 1.2  | 2.33 |
| LARGE        | 9215      | -0.09 | -1.43 | -2.33 | LOC399959 | 399959 | 0.54  | 1.68 | 2.33 |
| EPB41L4A     | 64097     | -1    | -1.73 | -2.33 | SLC19A2   | 10560  | 0.51  | 1.26 | 2.32 |
| C6ORF176     | 90632     | -0.36 | -1.35 | -2.33 | METRNL    | 284207 | -0.18 | 1.1  | 2.32 |
| NDRG4        | 65009     | -0.47 | -2.15 | -2.32 | SERTAD4   | 56256  | 0.35  | 1.01 | 2.32 |
| ZFP90        | 146198    | -0.99 | -1.52 | -2.32 | TNFRSF10B | 8795   | 0.57  | 1.57 | 2.3  |
| DPYSL5       | 56896     | -0.46 | -2    | -2.32 | BTG2      | 7832   | 0.19  | 0.76 | 2.29 |
| SNORD116-19  | 727708    | -0.58 | -1.67 | -2.31 | PLK3      | 1263   | 1.2   | 1.74 | 2.28 |
| MAGEH1       | 28986     | -0.09 | -0.96 | -2.3  | ROR1      | 4919   | 0.52  | 1.47 | 2.28 |
| LOC100288418 | 100288418 | -0.36 | -1.29 | -2.3  | PDGFB     | 5155   | 0.08  | 0.93 | 2.26 |
| VAV3         | 10451     | -0.06 | -1.66 | -2.29 | MAFK      | 7975   | 0.5   | 1.69 | 2.26 |
| ANXA13       | 312       | 0.17  | -0.76 | -2.26 | FRMD6     | 122786 | 0.15  | 0.79 | 2.26 |
| KAT2A        | 2648      | -0.2  | -1.21 | -2.25 | SLC22A5   | 6584   | 0.29  | 1.42 | 2.25 |
| HGD          | 3081      | -0.21 | -0.57 | -2.25 | SESN2     | 83667  | 0.81  | 1.97 | 2.24 |

|            |        |       |       |       |            |        |      |      |      |
|------------|--------|-------|-------|-------|------------|--------|------|------|------|
| RHOBTB1    | 9886   | -0.66 | -1.36 | -2.25 | ARID3A     | 1820   | 0.49 | 1.18 | 2.23 |
| C5ORF58    | 133874 | 0.04  | -0.93 | -2.25 | MAP2K3     | 5606   | 0.5  | 1.16 | 2.23 |
| RBM45      | 129831 | -0.66 | -1.36 | -2.25 | YRDC       | 79693  | 0.59 | 0.95 | 2.22 |
| APITD1     | 378708 | -0.48 | -1.37 | -2.24 | EFNA1      | 1942   | 0.61 | 1.05 | 2.21 |
| AZI1       | 22994  | -0.7  | -1.15 | -2.24 | KLF10      | 7071   | 0.23 | 0.9  | 2.2  |
| PTPRA      | 5786   | -0.03 | -0.95 | -2.23 | RBM24      | 221662 | 0.13 | 1.26 | 2.19 |
| C17ORF108  | 201229 | -0.37 | -1.13 | -2.22 | JUNB       | 3726   | 0.73 | 1.18 | 2.17 |
| CR848007.8 | 653436 | -1.9  | -1.8  | -2.22 | SLMO1      | 10650  | 0.09 | 1.37 | 2.17 |
| AKR1B15    | 441282 | 0.03  | -0.89 | -2.21 | MCTP1      | 79772  | 0.24 | 1.58 | 2.17 |
| TMEM149    | 79713  | 0.09  | -1.64 | -2.2  | FSTL3      | 10272  | 0.16 | 1.27 | 2.16 |
| TM4SF20    | 79853  | 0.22  | -1.82 | -2.2  | TSPAN5     | 10098  | 0.24 | 0.99 | 2.15 |
| RPUSD1     | 113000 | -0.64 | -1.33 | -2.2  | NR1D1      | 9572   | 0.64 | 0.66 | 2.15 |
| THYN1      | 29087  | -0.05 | -1.2  | -2.19 | PEA15      | 8682   | 0.12 | 1.06 | 2.14 |
| NT5M       | 56953  | 0.1   | -0.5  | -2.19 | LRRC8A     | 56262  | 0.36 | 1.2  | 2.14 |
| C11ORF71   | 54494  | 0.46  | -0.87 | -2.18 | PRR24      | 255783 | 0.55 | 1.83 | 2.14 |
| GALM       | 130589 | -0.01 | -1.26 | -2.18 | CDC42EP1   | 11135  | 0.39 | 1.35 | 2.12 |
| B3GALT4    | 8705   | -0.01 | -1.28 | -2.17 | ATAD1      | 84896  | 0.36 | 1.38 | 2.12 |
| CBR4       | 84869  | -0.08 | -0.79 | -2.17 | BTG1       | 694    | 0.41 | 1.07 | 2.11 |
| ANXA4      | 307    | -0.18 | -1.33 | -2.16 | GPRC5B     | 51704  | 0.02 | 0.39 | 2.11 |
| CCR7       | 1236   | -0.11 | -0.58 | -2.16 | GATA6      | 2627   | 0.8  | 0.95 | 2.11 |
| SPDEF      | 25803  | 0.16  | -1.74 | -2.16 | KLF4       | 9314   | 0.57 | 0.99 | 2.11 |
| C6ORF153   | 88745  | -0.88 | -1.63 | -2.15 | NCRNA00152 | 112597 | 0.22 | 1.2  | 2.1  |
| PTDSS1     | 9791   | -0.17 | -1.22 | -2.14 | TNFAIP2    | 7127   | 0.5  | 1.34 | 2.08 |
| GEMIN6     | 79833  | -0.38 | -1.15 | -2.14 | H1FO       | 3005   | 0.33 | 1.54 | 2.08 |
| ZNF18      | 7566   | -0.36 | -1.13 | -2.14 | NFKBIB     | 4793   | 0.2  | 1.04 | 2.08 |
| SPSB2      | 84727  | -0.35 | -0.94 | -2.14 | IL1RAP     | 3556   | 0.57 | 1.46 | 2.07 |
| STAT6      | 6778   | -0.7  | -1.25 | -2.13 | YIPF4      | 84272  | 0.56 | 1.62 | 2.07 |
| DIXDC1     | 85458  | -0.32 | -0.93 | -2.13 | STX3       | 6809   | 0.11 | 0.95 | 2.06 |
| SLFN11     | 91607  | -0.75 | -1.95 | -2.13 | ARID3B     | 10620  | 0.23 | 0.76 | 2.06 |
| NIPSNAP3A  | 25934  | 0.14  | -1.31 | -2.13 | ITPRIP     | 85450  | 0.74 | 1.36 | 2.06 |
| KRCC1      | 51315  | -0.97 | -1.47 | -2.12 | LATS2      | 26524  | 0.43 | 1.22 | 2.06 |

|              |           |       |       |       |           |        |       |       |      |
|--------------|-----------|-------|-------|-------|-----------|--------|-------|-------|------|
| PCYOX1L      | 78991     | 0.01  | -1.44 | -2.12 | EHD1      | 10938  | 0.23  | 1.19  | 2.05 |
| MEX3A        | 92312     | -0.93 | -1.68 | -2.12 | IER5      | 51278  | 0.92  | 1     | 2.04 |
| NMRAL1       | 57407     | -0.31 | -1.15 | -2.12 | PDRG1     | 81572  | -0.39 | 0.65  | 2.04 |
| ZNF575       | 284346    | -0.4  | -1.3  | -2.12 | CRY1      | 1407   | -0.3  | 0.82  | 2.01 |
| CYP2R1       | 120227    | -0.04 | -0.57 | -2.1  | ZNF335    | 63925  | 0.76  | 1.37  | 2.01 |
| C16ORF42     | 115939    | -0.11 | -1.04 | -2.1  | UPF1      | 5976   | -0.43 | 0.67  | 2    |
| ZNF362       | 149076    | -0.43 | -1.21 | -2.1  | PLD6      | 201164 | -0.23 | 0.9   | 2    |
| CAT          | 847       | 0     | -1.45 | -2.09 | IER2      | 9592   | 0.9   | 1.06  | 1.99 |
| CD14         | 929       | 0.39  | -1.21 | -2.09 | CCDC29    | 728788 | 0.12  | 1.28  | 1.99 |
| HDDC3        | 374659    | 0     | -0.81 | -2.09 | STK40     | 83931  | 0.59  | 1.58  | 1.98 |
| TRADD        | 8717      | -0.38 | -1.14 | -2.08 | C1ORF77   | 26097  | 0.27  | 1.38  | 1.97 |
| CD24         | 100133941 | -0.25 | -2    | -2.08 | NAB2      | 4665   | 0.4   | 0.4   | 1.97 |
| PDE8B        | 8622      | -0.75 | -1.45 | -2.08 | ODC1      | 4953   | 0.18  | 1.18  | 1.96 |
| NAMPT        | 10135     | -0.18 | -1.9  | -2.08 | AOC3      | 8639   | 0.2   | 1.12  | 1.95 |
| C11ORF35     | 256329    | -0.28 | -1.59 | -2.08 | NMS       | 129521 | -0.33 | -0.04 | 1.95 |
| RECQL4       | 9401      | -0.6  | -1.75 | -2.06 | LOC285441 | 285441 | -0.19 | -0.1  | 1.94 |
| LOC100134259 | 100134259 | 0.05  | -1.02 | -2.06 | TNPO2     | 30000  | 0.34  | 1.09  | 1.93 |
| SCARNA9      | 619383    | -0.71 | -1.18 | -2.06 | PRDM1     | 639    | 0.63  | 0.99  | 1.93 |
| SNORA77      | 677843    | -2.02 | -1.73 | -2.06 | CDC42SE1  | 56882  | 0.41  | 1.1   | 1.93 |
| RDBP         | 7936      | -0.02 | -1.03 | -2.05 | ASB10     | 136371 | 0.49  | 1.64  | 1.93 |
| RAB15        | 376267    | -0.41 | -1.75 | -2.05 | NCEH1     | 57552  | 0.55  | 1.16  | 1.93 |
| AKR1B1       | 231       | 0.03  | -0.95 | -2.04 | CTSK      | 1513   | 0.63  | 1.37  | 1.92 |
| CAPN5        | 726       | 0.09  | -0.46 | -2.04 | VEGFA     | 7422   | 0.48  | 1.57  | 1.92 |
| RGS10        | 6001      | 0.03  | -1.04 | -2.03 | YOD1      | 55432  | 0.63  | 1.47  | 1.92 |
| PRIM1        | 5557      | -0.9  | -1.53 | -2.03 | TUFT1     | 7286   | -0.2  | 0.86  | 1.91 |
| PIR          | 8544      | -0.07 | -1.05 | -2.03 | ABL2      | 27     | 0.07  | 0.57  | 1.91 |
| SCARNA13     | 677768    | -0.38 | -0.87 | -2.03 | PI4K2A    | 55361  | 0.28  | 0.9   | 1.91 |
| PIK3R2       | 5296      | -0.15 | -0.8  | -2.02 | MXD1      | 4084   | 0.54  | 1.13  | 1.9  |
| LRRC20       | 55222     | -0.43 | -0.82 | -2.02 | KRT10     | 3858   | 0.28  | 1.13  | 1.9  |
| DPYSL3       | 1809      | -0.03 | -1.39 | -2    | TBX2      | 6909   | 0.63  | 0.99  | 1.89 |
| OSBPL7       | 114881    | -0.42 | -1.02 | -2    | MARCH4    | 57574  | 0.19  | 1.16  | 1.89 |

|           |        |       |       |       |              |           |       |      |      |
|-----------|--------|-------|-------|-------|--------------|-----------|-------|------|------|
| MAGED4B   | 81557  | -0.35 | -1.44 | -2    | UBE2S        | 27338     | 0.44  | 1.13 | 1.88 |
| UROS      | 7390   | -0.29 | -1.21 | -1.99 | SLC35F2      | 54733     | 0.3   | 1.12 | 1.88 |
| F12       | 2161   | -0.08 | -1.07 | -1.99 | CLCF1        | 23529     | 0.43  | 1.04 | 1.88 |
| C1ORF93   | 127281 | -0.88 | -1.05 | -1.99 | CCNH         | 902       | 0.18  | 0.53 | 1.87 |
| AKR1B10   | 57016  | 0.04  | -0.8  | -1.97 | DUSP6        | 1848      | 0.81  | 1.02 | 1.87 |
| SYT12     | 91683  | -0.29 | -1.15 | -1.97 | ZNF143       | 7702      | 0.34  | 0.93 | 1.87 |
| SLC40A1   | 30061  | -0.05 | -1    | -1.97 | AMD1         | 262       | 0.21  | 1.31 | 1.86 |
| SNAPIN    | 23557  | -0.35 | -1.08 | -1.97 | MAP1LC3B     | 81631     | 0.39  | 1.25 | 1.86 |
| MYLK      | 4638   | -0.27 | -1.5  | -1.96 | YPEL5        | 51646     | 0.5   | 1.09 | 1.86 |
| LRFN3     | 79414  | -0.07 | -0.66 | -1.96 | LOC100131209 | 100131209 | 1.38  | 1.54 | 1.86 |
| ANXA6     | 309    | -0.26 | -1.6  | -1.95 | DDX3Y        | 8653      | 0.36  | 0.9  | 1.85 |
| SETBP1    | 26040  | -0.36 | -1.42 | -1.95 | NFAT5        | 10725     | 0.14  | 0.92 | 1.85 |
| B9D1      | 27077  | -0.17 | -1.28 | -1.94 | PFKFB4       | 5210      | 0.53  | 1.14 | 1.84 |
| MUTYH     | 4595   | -0.42 | -1.07 | -1.94 | AVPI1        | 60370     | 0.44  | 0.92 | 1.84 |
| CCDC53    | 51019  | -0.12 | -1.25 | -1.94 | ADCY10       | 55811     | 0.2   | 0.47 | 1.83 |
| FAM175A   | 84142  | -0.34 | -1.28 | -1.94 | PHC2         | 1912      | 0.6   | 1.07 | 1.82 |
| TTC30B    | 150737 | -0.64 | -1.16 | -1.94 | ELFN2        | 114794    | 0.41  | 0.79 | 1.82 |
| LIG1      | 3978   | -0.09 | -1.27 | -1.93 | ORAOV1       | 220064    | -0.36 | 0.53 | 1.82 |
| MTUS1     | 57509  | -0.42 | -1.11 | -1.93 | ID2          | 3398      | 0.59  | 0.98 | 1.81 |
| C16ORF59  | 80178  | -0.48 | -0.91 | -1.93 | TNFAIP3      | 7128      | 0.14  | 0.42 | 1.81 |
| BTBD6     | 90135  | -0.82 | -1.37 | -1.93 | SEMA3C       | 10512     | 0.39  | 1.01 | 1.81 |
| C20ORF108 | 116151 | -0.3  | -1.41 | -1.93 | TLE4         | 7091      | 0.26  | 0.77 | 1.81 |
| LOC729680 | 729680 | -0.98 | -1.5  | -1.93 | DCP1A        | 55802     | 0.41  | 1    | 1.81 |
| RHOV      | 171177 | 0.29  | -0.9  | -1.93 | ARHGAP15     | 55843     | 0.36  | 0.28 | 1.8  |
| ZNF793    | 390927 | -1.99 | -1.72 | -1.93 | CHIC2        | 26511     | 0.43  | 0.82 | 1.8  |
| OAZ1      | 4946   | -0.06 | -1.06 | -1.92 | LOC652191    | 652191    | 0.62  | 1.29 | 1.8  |
| PYCARD    | 29108  | 0.13  | -0.55 | -1.92 | ANKRD1       | 27063     | 0.52  | 1.01 | 1.79 |
| NDUFB10   | 4716   | -0.02 | -0.55 | -1.91 | CDCA4        | 55038     | 0.75  | 0.69 | 1.79 |
| NOTCH3    | 4854   | 0.39  | -0.92 | -1.9  | PRKCE        | 5581      | 0.59  | 1.43 | 1.78 |
| PLD2      | 5338   | -0.07 | -1.03 | -1.9  | PKP2         | 5318      | -0.18 | 0.3  | 1.78 |
| DET1      | 55070  | -1.04 | -1.05 | -1.9  | PDE12        | 201626    | 0.37  | 0.62 | 1.78 |

|             |        |       |       |       |           |        |       |      |      |
|-------------|--------|-------|-------|-------|-----------|--------|-------|------|------|
| SFRS13B     | 135295 | -1.46 | -1.67 | -1.9  | C7ORF53   | 286006 | 0.81  | 1.38 | 1.78 |
| PRKCDBP     | 112464 | -0.04 | -0.83 | -1.89 | LOC392288 | 392288 | 0.52  | 1.27 | 1.78 |
| NUDT7       | 283927 | 0.1   | -0.81 | -1.89 | TERF2IP   | 54386  | 0.81  | 1.08 | 1.77 |
| EXD2        | 55218  | -1.03 | -1.43 | -1.89 | COL4A1    | 1282   | 0.33  | 0.98 | 1.77 |
| LOC375190   | 375190 | -0.42 | -1.21 | -1.89 | GDF6      | 392255 | 0.01  | 0.37 | 1.77 |
| TSTA3       | 7264   | -0.18 | -1.6  | -1.88 | MCL1      | 4170   | 0.94  | 1.32 | 1.76 |
| DOK1        | 1796   | -0.31 | -0.95 | -1.88 | TAP1      | 6890   | 0.56  | 1.57 | 1.76 |
| HCG_1776007 | 146713 | 0.42  | 0.08  | -1.88 | NR4A3     | 8013   | 1.21  | 1.08 | 1.76 |
| TBCD        | 6904   | -0.1  | -1.24 | -1.87 | VPS37B    | 79720  | 0.14  | 0.72 | 1.76 |
| RPP40       | 10799  | -0.26 | -1.16 | -1.87 | MGC12916  | 84815  | 0.76  | 0.48 | 1.76 |
| SIDT1       | 54847  | 0.31  | -0.99 | -1.87 | CCDC64B   | 146439 | -0.01 | 0.43 | 1.76 |
| ZC4H2       | 55906  | -0.25 | -1.3  | -1.87 | EXOC3L2   | 90332  | -0.17 | 0.32 | 1.76 |
| PHKB        | 5257   | -0.24 | -0.97 | -1.86 | ADRB1     | 153    | 0.34  | 1.14 | 1.75 |
| NETO2       | 81831  | -0.04 | -0.96 | -1.86 | LYPD1     | 116372 | 0.24  | 1.18 | 1.75 |
| TNS4        | 84951  | 0.39  | -0.35 | -1.86 | TXNL4B    | 54957  | -0.34 | 0.33 | 1.75 |
| CXXC5       | 51523  | 0.02  | -0.97 | -1.86 | TOP1P2    | 7152   | 0.42  | 0.9  | 1.75 |
| ANKRD16     | 54522  | -0.72 | -0.9  | -1.86 | PRKAB1    | 5564   | 0.19  | 0.72 | 1.74 |
| LIPC        | 3990   | -1.2  | -1.33 | -1.85 | NPC1      | 4864   | 0.2   | 1.04 | 1.74 |
| ELAC1       | 55520  | -1.13 | -1.46 | -1.85 | RIT1      | 6016   | -0.01 | 0.92 | 1.74 |
| MPI         | 4351   | -0.19 | -0.96 | -1.84 | VGFB      | 7425   | 0.51  | 1.08 | 1.73 |
| BDKRB2      | 624    | 0.62  | -0.14 | -1.84 | ELK3      | 2004   | 0.42  | 0.94 | 1.73 |
| CUL9        | 23113  | -0.1  | -0.51 | -1.84 | HAS2      | 3037   | 0.4   | 0.57 | 1.73 |
| LOC283482   | 283482 | -1.17 | -1.55 | -1.84 | PHLDA2    | 7262   | 0.93  | 0.88 | 1.73 |
| ALDH3A1     | 218    | 0.19  | -1.03 | -1.83 | TICAM1    | 148022 | 0.6   | 1.1  | 1.73 |
| MAP2K6      | 5608   | -0.57 | -1.76 | -1.83 | RSC1A1    | 6248   | 0.19  | 0.37 | 1.73 |
| KRT4        | 3851   | -0.06 | -1.25 | -1.83 | HOXC13    | 3229   | 0.5   | 1.09 | 1.73 |
| SEPX1       | 51734  | -0.27 | -1.31 | -1.83 | C19ORF61  | 56006  | 0.07  | 1.01 | 1.73 |
| NTNG2       | 84628  | -0.19 | -1.3  | -1.83 | DAGLB     | 221955 | 0.38  | 0.95 | 1.73 |
| LOC554202   | 554202 | -0.04 | -1.19 | -1.83 | C3ORF59   | 151963 | 0.16  | 0.36 | 1.73 |
| KRT19       | 3880   | 0.08  | -1.05 | -1.82 | IER3      | 8870   | 0.88  | 1.18 | 1.72 |
| NTRK3       | 4916   | -0.15 | -1.7  | -1.82 | EIF1B     | 10289  | 0.85  | 1.46 | 1.72 |

|              |           |       |       |       |           |        |       |      |      |
|--------------|-----------|-------|-------|-------|-----------|--------|-------|------|------|
| CYB5A        | 1528      | 0.1   | -1.05 | -1.82 | PMAIP1    | 5366   | 0.66  | 1.3  | 1.72 |
| MYH10        | 4628      | -0.17 | -1.05 | -1.82 | PLEK2     | 26499  | 0.14  | 0.99 | 1.72 |
| CCDC80       | 151887    | -0.21 | -1.11 | -1.82 | C1GALT1   | 56913  | 0.42  | 0.92 | 1.72 |
| DDIT4L       | 115265    | -0.72 | -1.08 | -1.82 | CHST11    | 50515  | 0.41  | 1.44 | 1.71 |
| CDH1         | 999       | 0.17  | -1.13 | -1.81 | PHLDB3    | 653583 | -0.23 | 0.66 | 1.71 |
| MPST         | 4357      | 0.01  | -0.5  | -1.81 | DDX10     | 1662   | 0.5   | 1.18 | 1.7  |
| CGNL1        | 84952     | -0.31 | -1.71 | -1.81 | DUSP5     | 1847   | 0.97  | 1.67 | 1.7  |
| RAB37        | 326624    | -0.12 | -1.06 | -1.8  | UPF3B     | 65109  | 0.15  | 0.97 | 1.7  |
| UBAC1        | 10422     | -0.33 | -0.88 | -1.79 | KCTD11    | 147040 | -0.12 | 0.39 | 1.7  |
| MVK          | 4598      | -0.26 | -1.36 | -1.79 | KCNJ14    | 3770   | 0.73  | 1.21 | 1.69 |
| LOC375295    | 375295    | -0.35 | -1.21 | -1.79 | LOC286109 | 286109 | 0.26  | 0.76 | 1.69 |
| BTBD11       | 121551    | 0.11  | -0.03 | -1.79 | GSTTP2    | 653399 | -0.16 | 0.24 | 1.69 |
| HNRNPA1      | 3178      | 0.13  | -0.93 | -1.78 | TGM2      | 7052   | 0.27  | 0.76 | 1.68 |
| MTIF2        | 4528      | -0.4  | -0.51 | -1.78 | TFAP2C    | 7022   | 0.56  | 1.27 | 1.68 |
| PIK3C2B      | 5287      | -0.32 | -0.49 | -1.78 | PPP1R2P9  | 80316  | 0.32  | 0.08 | 1.68 |
| OCEL1        | 79629     | 0.49  | -0.53 | -1.78 | CLDND1    | 56650  | 0.33  | 0.99 | 1.68 |
| LOC644189    | 644189    | -0.59 | -1.29 | -1.78 | TM4SF1    | 4071   | 0.11  | 0.73 | 1.67 |
| RHPN1        | 114822    | -0.61 | -1.08 | -1.78 | EAF1      | 85403  | 0.31  | 0.75 | 1.67 |
| EIF2B3       | 8891      | -0.16 | -0.69 | -1.77 | FAM72A    | 729533 | 0.74  | 1.24 | 1.67 |
| LOC439949    | 439949    | -0.07 | -0.93 | -1.77 | LOC388965 | 388965 | 0.28  | 1.11 | 1.67 |
| ZBTB42       | 100128927 | -0.39 | -1.17 | -1.77 | FBXL21    | 26223  | 0.46  | 0.66 | 1.66 |
| OAS1         | 4938      | 0.16  | -0.84 | -1.76 | CDK6      | 1021   | -0.36 | 0.39 | 1.65 |
| SQRDL        | 58472     | -0.15 | -0.82 | -1.76 | ID4       | 3400   | 1.11  | 0.7  | 1.65 |
| USP9X        | 8239      | -0.53 | -1.4  | -1.75 | MAPK8IP3  | 23162  | 0.12  | 0.81 | 1.65 |
| IMPA2        | 3613      | -0.25 | -0.8  | -1.75 | KLHL28    | 54813  | 0.61  | 0.95 | 1.65 |
| PBX1         | 5087      | -0.29 | -0.78 | -1.75 | MYO1G     | 64005  | 0.82  | 0.82 | 1.65 |
| RHOBTB2      | 23221     | -0.05 | -0.41 | -1.75 | CTNNAL1   | 8727   | 0.18  | 1.06 | 1.64 |
| WDR4         | 10785     | -0.97 | -1.01 | -1.75 | MITF      | 4286   | 0.39  | 1.18 | 1.64 |
| LOC100132733 | 100132733 | -0.62 | -1.26 | -1.75 | TIPARP    | 25976  | 0.3   | 1    | 1.64 |
| SLC25A29     | 123096    | -0.36 | -1.6  | -1.75 | LOC157562 | 157562 | 0.38  | 1.17 | 1.64 |
| CCNB3        | 85417     | -1.23 | -1.41 | -1.75 | PPM1D     | 8493   | 0.37  | 0.86 | 1.63 |



|           |        |       |       |       |          |        |       |       |      |
|-----------|--------|-------|-------|-------|----------|--------|-------|-------|------|
| SAC3D1    | 29901  | -0.42 | -0.9  | -1.74 | REL      | 5966   | 0.42  | 0.8   | 1.63 |
| SNRNP25   | 79622  | -0.12 | -1.41 | -1.74 | AKAP12   | 9590   | -0.28 | 0.69  | 1.63 |
| ECHDC2    | 55268  | -0.4  | -1.42 | -1.74 | ORAI1    | 84876  | 0.44  | 0.82  | 1.63 |
| C4ORF42   | 92070  | -0.71 | -1.2  | -1.74 | JAZF1    | 221895 | 0.42  | 0.74  | 1.63 |
| ADSSL1    | 122622 | 0.27  | -0.74 | -1.74 | TNFSF9   | 8744   | 1.12  | 1.21  | 1.62 |
| POLR3GL   | 84265  | 0.16  | -0.65 | -1.74 | KCNF1    | 3754   | 0.37  | 1.11  | 1.62 |
| BFSP1     | 631    | 0.13  | -0.47 | -1.73 | CRY2     | 1408   | 0.19  | -0.03 | 1.62 |
| LOC729983 | 729983 | -0.34 | -0.34 | -1.73 | IGF2BP2  | 10644  | 0.12  | 0.84  | 1.62 |
| PDCD2L    | 84306  | -0.41 | -0.8  | -1.73 | CITED4   | 163732 | 0.24  | 1.16  | 1.62 |
| OMA1      | 115209 | -0.1  | -1.28 | -1.73 | BTBD10   | 84280  | 0.13  | 0.57  | 1.62 |
| RIMKLA    | 284716 | -0.15 | -1.49 | -1.73 | DDX6     | 1656   | 0.22  | 1.12  | 1.61 |
| FAM102A   | 399665 | 0.09  | -0.37 | -1.72 | PDP1     | 54704  | 0.46  | 1.14  | 1.61 |
| SPATA7    | 55812  | -0.32 | -1.01 | -1.72 | PLOD2    | 5352   | 0.08  | 0.83  | 1.6  |
| XRCC6BP1  | 91419  | -0.23 | -1.09 | -1.72 | FGFR1OP  | 11116  | 0.07  | 0.67  | 1.6  |
| MDP1      | 145553 | 0.18  | -0.66 | -1.72 | CORO1C   | 23603  | 0.08  | 0.47  | 1.6  |
| ROS1      | 6098   | -1.47 | -1.11 | -1.71 | FNIP1    | 96459  | 0.14  | 0.73  | 1.6  |
| DOK4      | 55715  | 0.06  | -0.55 | -1.71 | HIVEP1   | 3096   | -0.05 | 0.44  | 1.59 |
| TPCN1     | 53373  | -0.29 | -1.05 | -1.71 | TOP1     | 7150   | 0.38  | 0.82  | 1.59 |
| SLC25A10  | 1468   | -0.33 | -1.35 | -1.71 | DMPK     | 1760   | 0     | 0.7   | 1.59 |
| KLHDC9    | 126823 | -0.05 | -1.24 | -1.71 | FAM83G   | 644815 | 0.55  | 0.93  | 1.59 |
| STARD7    | 56910  | -1    | -1.48 | -1.7  | LETM2    | 137994 | 0.12  | 1.03  | 1.59 |
| HS6ST1    | 9394   | 0.05  | -1.02 | -1.7  | LRRC8C   | 84230  | 0.11  | 0.64  | 1.59 |
| DHRS1     | 115817 | 0.03  | -1.02 | -1.7  | BCAR3    | 8412   | 0.61  | 1.28  | 1.58 |
| FAM162A   | 26355  | 0.02  | -0.96 | -1.7  | ZBTB11   | 27107  | 0.43  | 0.75  | 1.58 |
| LIPT2     | 387787 | -0.04 | -0.79 | -1.7  | RANGAP1  | 5905   | -0.13 | 0.47  | 1.58 |
| SLC9A3R1  | 9368   | -0.01 | -1.45 | -1.69 | WEE1     | 7465   | 0.75  | 0.52  | 1.58 |
| BCKDK     | 10295  | -0.12 | -0.93 | -1.69 | LRRC8E   | 80131  | -0.03 | 0.35  | 1.58 |
| EHMT2     | 10919  | -0.4  | -0.79 | -1.69 | FLJ46120 | 647008 | 0.08  | 0.29  | 1.58 |
| KIAA0101  | 9768   | 0.03  | -0.93 | -1.69 | GABPB1   | 2553   | -0.22 | 0.45  | 1.57 |
| FCGBP     | 8857   | 0.13  | -1.13 | -1.69 | TAF13    | 6884   | 0.27  | 0.77  | 1.57 |
| P2RY6     | 5031   | -0.13 | -1.01 | -1.69 | DR1      | 1810   | 0.56  | 1.15  | 1.57 |

|              |           |       |       |       |              |           |       |       |      |
|--------------|-----------|-------|-------|-------|--------------|-----------|-------|-------|------|
| CBR1         | 873       | -0.12 | -0.71 | -1.69 | ZFR2         | 23217     | -0.17 | -0.12 | 1.57 |
| DLL3         | 10683     | 0.22  | -0.6  | -1.69 | LOC285697    | 285697    | 0.21  | 0.29  | 1.57 |
| RNF213       | 57674     | -0.41 | -1.45 | -1.69 | CD55         | 1604      | 0.62  | 1.36  | 1.56 |
| A2LD1        | 87769     | -0.17 | -1.4  | -1.69 | THAP1        | 55145     | 0.41  | 0.87  | 1.56 |
| KIAA0100     | 9703      | -0.35 | -0.86 | -1.68 | CORIN        | 10699     | -0.06 | -0.03 | 1.56 |
| TREX1        | 11277     | -0.1  | -0.85 | -1.68 | ZSWIM4       | 65249     | 0.45  | 0.88  | 1.56 |
| ZNF33B       | 7582      | -0.88 | -1.03 | -1.68 | RELT         | 84957     | 0.39  | 0.44  | 1.56 |
| RSAD1        | 55316     | -0.27 | -0.83 | -1.68 | TRAM2        | 9697      | -0.29 | 0.59  | 1.55 |
| LYPLAL1      | 127018    | -0.11 | -0.93 | -1.68 | CSNK1D       | 1453      | 0.07  | 0.9   | 1.55 |
| LOC440047    | 440047    | -1.45 | -1.17 | -1.68 | PPAP2B       | 8613      | 0.5   | 0.66  | 1.55 |
| ACADSB       | 36        | -0.31 | -1.05 | -1.67 | MORC3        | 23515     | 0.42  | 0.73  | 1.55 |
| GALNT10      | 55568     | -0.39 | -1.58 | -1.67 | SAR1B        | 51128     | 0.21  | 0.9   | 1.55 |
| SGCD         | 6444      | 0.01  | -1.07 | -1.67 | PAIP2        | 51247     | 0.32  | 1     | 1.55 |
| PNPO         | 55163     | -0.19 | -1.04 | -1.67 | TRIML2       | 205860    | 0.16  | 0.93  | 1.55 |
| UBE2D4       | 51619     | -0.17 | -0.88 | -1.67 | ZNF805       | 390980    | 0.4   | 1.03  | 1.55 |
| NSMCE1       | 197370    | -0.07 | -0.93 | -1.67 | CBY3         | 646019    | 0.3   | 0.59  | 1.55 |
| HCG_1659830  | 728111    | 0.14  | -0.2  | -1.67 | BAK1         | 578       | 0.52  | 1.13  | 1.54 |
| LOC100130111 | 100130111 | 0     | -0.54 | -1.67 | DNMBP        | 23268     | 0.36  | 0.96  | 1.54 |
| BAMBI        | 25805     | 0.05  | -1.16 | -1.66 | GPN2         | 54707     | 0.04  | 0.36  | 1.54 |
| FUT8         | 2530      | 0.08  | -0.56 | -1.66 | CCL14        | 6358      | -0.14 | 0     | 1.53 |
| SMARCD3      | 6604      | -0.26 | -1.15 | -1.66 | HIC2         | 23119     | 0.34  | 0.77  | 1.53 |
| QDPR         | 5860      | 0.26  | -0.53 | -1.66 | UBE2W        | 55284     | 0.36  | 0.92  | 1.53 |
| SLC9A3R2     | 9351      | -0.13 | -1.29 | -1.66 | LOC100133180 | 100133180 | 0.32  | 0.71  | 1.53 |
| GMPPA        | 29926     | -0.3  | -0.52 | -1.66 | TGIF2LY      | 90655     | 0.28  | 0.58  | 1.53 |
| C7ORF68      | 29923     | -0.61 | -0.84 | -1.66 | FAM126B      | 285172    | -0.06 | 0.44  | 1.53 |
| C16ORF74     | 404550    | -0.44 | -1.11 | -1.66 | SLC25A17     | 10478     | 0.25  | 0.78  | 1.52 |
| C8ORF40      | 114926    | -0.02 | -0.67 | -1.66 | LAMC1        | 3915      | 0.24  | 1.05  | 1.51 |
| OSTBETA      | 123264    | 0.29  | -0.95 | -1.66 | BHLHE40      | 8553      | 1.31  | 1     | 1.51 |
| SNORA62      | 6044      | -1.03 | -1.47 | -1.66 | PEX13        | 5194      | 0.24  | 0.75  | 1.51 |
| IMPDH2       | 3615      | 0.08  | -0.45 | -1.65 | GTPBP1       | 9567      | 0.56  | 0.63  | 1.51 |
| EBAG9        | 9166      | -0.37 | -0.64 | -1.65 | FOSL2        | 2355      | 0.59  | 0.47  | 1.51 |

|           |        |       |       |       |          |        |       |       |      |
|-----------|--------|-------|-------|-------|----------|--------|-------|-------|------|
| SEPT6     | 23157  | -0.07 | -0.82 | -1.65 | SH2D3A   | 10045  | 0.38  | 1.02  | 1.51 |
| PDE7B     | 27115  | -1.38 | -1.43 | -1.65 | LEMD2    | 221496 | 0.08  | 0.68  | 1.51 |
| DCDC2     | 51473  | -0.48 | -1.48 | -1.65 | LOC93444 | 93444  | 0.14  | 0.35  | 1.51 |
| FLJ90757  | 440465 | -0.48 | -1.31 | -1.65 | CHMP4C   | 92421  | -0.06 | 0.61  | 1.51 |
| C16ORF35  | 8131   | -0.6  | -0.94 | -1.64 | PCMT1    | 5110   | 0.2   | 0.6   | 1.5  |
| GNAZ      | 2781   | 0.14  | -0.45 | -1.64 | ZNF609   | 23060  | 0.34  | 0.99  | 1.5  |
| ARHGAP26  | 23092  | -0.04 | -0.82 | -1.64 | TMEM194A | 23306  | 0.04  | 0.67  | 1.5  |
| RBBP9     | 10741  | -0.33 | -1.02 | -1.64 | C6ORF145 | 221749 | 0.14  | 0.89  | 1.5  |
| WDR54     | 84058  | -0.27 | -1.26 | -1.64 | COTL1    | 23406  | 0.13  | 0.98  | 1.5  |
| CYB5B     | 80777  | -0.29 | -0.89 | -1.63 | SLC7A6OS | 84138  | 0.32  | 1.02  | 1.5  |
| GRB14     | 2888   | -0.13 | -0.66 | -1.63 | SLC25A25 | 114789 | 0.47  | 0.64  | 1.5  |
| ZNF643    | 65243  | -0.36 | -1.03 | -1.63 | BTN2A1   | 11120  | 0.13  | 0.72  | 1.49 |
| C6ORF62   | 81688  | -0.85 | -1.57 | -1.63 | RASGRP1  | 10125  | -0.29 | 0.11  | 1.49 |
| ZNF658    | 26149  | -0.66 | -0.84 | -1.63 | SERPINB8 | 5271   | -0.02 | 0.71  | 1.49 |
| PTGFRN    | 5738   | 0.22  | -0.98 | -1.63 | TAF1A    | 9015   | 0.32  | 0.79  | 1.49 |
| LOC286161 | 286161 | -0.9  | -1.32 | -1.63 | ARRDC4   | 91947  | 0.24  | 0.81  | 1.49 |
| HS3ST1    | 9957   | 0.52  | -0.47 | -1.62 | KIAA0182 | 23199  | 0.58  | 0.84  | 1.48 |
| ALDH3B1   | 221    | -0.29 | -0.47 | -1.62 | RRP12    | 23223  | -0.22 | 0.63  | 1.48 |
| RHOQ      | 23433  | -0.22 | -0.65 | -1.62 | TRIAP1   | 51499  | 0.25  | 0.95  | 1.48 |
| KIAA0528  | 9847   | -0.36 | -1.03 | -1.62 | COQ10B   | 80219  | 0.5   | 0.9   | 1.48 |
| FCHO1     | 23149  | 0.12  | -0.73 | -1.62 | PKD1L1   | 168507 | 0.29  | 0.49  | 1.48 |
| EML4      | 27436  | -0.54 | -1.47 | -1.62 | DAPK3    | 1613   | -0.46 | 0.34  | 1.47 |
| LOC283352 | 283352 | 0.15  | -0.35 | -1.62 | RRAS2    | 22800  | 0.43  | 0.72  | 1.47 |
| HNRPDL    | 9987   | -0.12 | -1.6  | -1.61 | SMURF1   | 57154  | 0.36  | 0.82  | 1.47 |
| POP5      | 51367  | -0.09 | -0.69 | -1.61 | RND3     | 390    | 0.56  | 1.07  | 1.47 |
| MAGED1    | 9500   | 0.17  | -1.13 | -1.61 | PHLDA1   | 22822  | 0.84  | 1.14  | 1.47 |
| AKR1C3    | 8644   | -0.06 | -0.67 | -1.61 | SGPP1    | 81537  | 0.5   | 0.84  | 1.47 |
| FHOD3     | 80206  | -0.52 | -1.12 | -1.61 | SBDS     | 51119  | 0.17  | 0.79  | 1.47 |
| ARHGEF10L | 55160  | -0.23 | -1.07 | -1.61 | TMEM196  | 256130 | -0.12 | -0.02 | 1.47 |
| C10ORF114 | 399726 | -0.22 | -0.65 | -1.61 | ITGA5    | 3678   | 0.47  | 1.09  | 1.46 |
| C3ORF1    | 51300  | -0.19 | -0.62 | -1.61 | INPP1    | 3628   | 0.52  | 1.13  | 1.46 |

|           |        |       |       |       |           |           |       |       |      |
|-----------|--------|-------|-------|-------|-----------|-----------|-------|-------|------|
| DPYSL2    | 1808   | 0.21  | -0.03 | -1.6  | CLK4      | 57396     | 1     | 1.03  | 1.46 |
| CLDN3     | 1365   | -0.12 | -1.24 | -1.6  | RUSC2     | 9853      | 0.18  | 0.84  | 1.46 |
| KCNJ6     | 3763   | -0.23 | -0.55 | -1.6  | ARL8B     | 55207     | -0.02 | 0.62  | 1.46 |
| TP53I3    | 9540   | -0.31 | -1.16 | -1.6  | REC8      | 9985      | 0.36  | 1.09  | 1.46 |
| TTC12     | 54970  | -0.5  | -1.56 | -1.6  | CCBE1     | 147372    | 0.4   | 0.83  | 1.46 |
| MRPS34    | 65993  | 0.08  | -0.56 | -1.6  | CXCL1     | 2919      | 0.36  | 0.36  | 1.45 |
| AMZ2      | 51321  | -0.12 | -0.72 | -1.6  | STC1      | 6781      | 0.87  | 0.86  | 1.45 |
| LRRC8D    | 55144  | -1.01 | -1.24 | -1.6  | PFDN2     | 5202      | 0.31  | 0.91  | 1.45 |
| POPDC3    | 64208  | 0.26  | -0.98 | -1.6  | ZNF654    | 55279     | 0.3   | 0.51  | 1.45 |
| FBXO4     | 26272  | -0.3  | -1.07 | -1.6  | LIN52     | 91750     | 0.36  | 0.76  | 1.45 |
| DENND2D   | 79961  | -0.47 | -1.14 | -1.6  | MGC16703  | 113691    | 0.2   | 0.65  | 1.45 |
| CCDC125   | 202243 | -1.03 | -1.17 | -1.6  | TMEM88    | 92162     | 0.06  | 0.74  | 1.45 |
| LOC401431 | 401431 | -1.3  | -1.48 | -1.6  | IL32      | 9235      | 0.09  | 0.79  | 1.44 |
| DBN1      | 1627   | -0.53 | -1.37 | -1.59 | LIF       | 3976      | 0.27  | 0.93  | 1.44 |
| STK16     | 8576   | 0.07  | -0.4  | -1.59 | SERINC1   | 57515     | 0.05  | 0.86  | 1.44 |
| ADAT1     | 23536  | -0.75 | -1.05 | -1.59 | MICA      | 4276      | 0.46  | 1.1   | 1.44 |
| TMEM143   | 55260  | 0.14  | -0.91 | -1.59 | HCN3      | 57657     | 0.28  | 0.57  | 1.44 |
| RNASEL    | 6041   | -0.55 | -0.83 | -1.59 | ATP1B1    | 481       | 0.5   | 0.89  | 1.43 |
| GLRX      | 2745   | -0.01 | -0.57 | -1.58 | MRPL49    | 740       | 0.16  | 0.76  | 1.43 |
| ZMYND8    | 23613  | -0.43 | -0.8  | -1.58 | STX1A     | 6804      | 0.24  | 0.9   | 1.43 |
| HOXA6     | 3203   | -0.61 | -0.65 | -1.58 | DPH3B     | 100132911 | 0.18  | 0.82  | 1.43 |
| WFDC8     | 90199  | -1.39 | -1.17 | -1.58 | LOC221710 | 221710    | -0.08 | 0.45  | 1.43 |
| PRMT7     | 54496  | -0.66 | -1.09 | -1.58 | ATXN2     | 6311      | 0.13  | 0.66  | 1.42 |
| OSGEPL1   | 64172  | -0.29 | -0.33 | -1.58 | HMGCS1    | 3157      | 0.09  | -0.01 | 1.42 |
| THAP8     | 199745 | -0.22 | -0.91 | -1.58 | PLAUR     | 5329      | 0.58  | 0.98  | 1.42 |
| C20ORF141 | 128653 | 0.16  | -0.24 | -1.58 | PRKAB2    | 5565      | -0.35 | 0.51  | 1.42 |
| LOC388242 | 388242 | 0.18  | -1.07 | -1.58 | TMEM167B  | 56900     | 0.3   | 0.97  | 1.42 |
| LPGAT1    | 9926   | -0.13 | -1.09 | -1.57 | FGD4      | 121512    | -0.26 | 0.42  | 1.42 |
| HOXB6     | 3216   | 0.27  | -0.87 | -1.57 | GDI1      | 2664      | 0.37  | 1.07  | 1.41 |
| PACS2     | 23241  | -0.35 | -0.73 | -1.57 | NEU1      | 4758      | 0.31  | 0.79  | 1.41 |
| MEGF8     | 1954   | -0.19 | -0.73 | -1.57 | FERMT2    | 10979     | 0.02  | 0.32  | 1.41 |

|          |           |       |       |       |          |        |       |      |      |
|----------|-----------|-------|-------|-------|----------|--------|-------|------|------|
| CHST12   | 55501     | 0.15  | -0.9  | -1.57 | AKAP8L   | 26993  | 0.54  | 0.98 | 1.41 |
| ACCS     | 84680     | -0.21 | -0.77 | -1.57 | UFM1     | 51569  | 0.2   | 0.91 | 1.41 |
| MRPS26   | 64949     | -0.03 | -0.64 | -1.57 | RHBDF1   | 64285  | -0.22 | 0.66 | 1.41 |
| C9ORF23  | 138716    | -0.12 | -0.6  | -1.57 | BCOR     | 54880  | 0.6   | 0.88 | 1.41 |
| C9ORF150 | 286343    | 0.42  | -0.27 | -1.57 | MED15    | 51586  | 0.3   | 0.87 | 1.41 |
| PACSIN1  | 29993     | -0.24 | -1.28 | -1.57 | ATG4D    | 84971  | 0.47  | 1    | 1.41 |
| THRA     | 7067      | -0.13 | -1.17 | -1.56 | PPP1R15B | 84919  | 0.11  | 0.79 | 1.41 |
| SNAP25   | 6616      | -0.1  | -1.27 | -1.56 | SMAD7    | 4092   | 0.37  | 0.77 | 1.4  |
| HEXIM1   | 10614     | -0.05 | -0.44 | -1.56 | ARID1A   | 8289   | -0.04 | 0.5  | 1.4  |
| LQK1     | 642946    | -0.14 | -0.91 | -1.56 | KLF6     | 1316   | 0     | 0.12 | 1.4  |
| RNF135   | 84282     | -0.24 | -0.54 | -1.56 | GPATCH8  | 23131  | 0.23  | 0.86 | 1.4  |
| PTPN18   | 26469     | -0.08 | -0.83 | -1.55 | MOSPD1   | 56180  | 0.32  | 0.81 | 1.4  |
| CA12     | 771       | 0.13  | -0.6  | -1.55 | SOCS2    | 8835   | -0.2  | 0.16 | 1.39 |
| TOP2B    | 7155      | -0.2  | -0.79 | -1.55 | RAB32    | 10981  | 0.29  | 0.86 | 1.39 |
| DCTPP1   | 79077     | -0.37 | -1.1  | -1.55 | PHLDA3   | 23612  | 0.1   | 0.77 | 1.39 |
| TMBIM4   | 51643     | 0.01  | -1.16 | -1.55 | KLK12    | 43849  | 0.05  | 0.14 | 1.39 |
| FLJ37798 | 401264    | -0.21 | -1.13 | -1.55 | OR5M1    | 390168 | 0.06  | 0.33 | 1.39 |
| LOC93622 | 93622     | -0.18 | -0.92 | -1.55 | SAMD8    | 142891 | 0.22  | 0.57 | 1.39 |
| SNORD123 | 100113384 | -1.27 | -0.94 | -1.55 | ARF4     | 378    | 0.1   | 0.44 | 1.38 |
| CPOX     | 1371      | 0.22  | -0.57 | -1.54 | HSPA13   | 6782   | 0.38  | 1.13 | 1.38 |
| RGS19    | 10287     | 0     | -0.75 | -1.54 | SERTAD2  | 9792   | 0.48  | 0.4  | 1.38 |
| VDAC3    | 7419      | -0.23 | -0.93 | -1.54 | SP2      | 6668   | 0.2   | 0.61 | 1.38 |
| LRP4     | 4038      | 0.27  | -0.97 | -1.54 | OXTR     | 5021   | -0.03 | 0.21 | 1.38 |
| C8ORF55  | 51337     | -0.03 | -0.37 | -1.54 | CXCL2    | 2920   | 0.42  | 0.33 | 1.38 |
| ALKBH2   | 121642    | -0.36 | -0.5  | -1.54 | RCL1     | 10171  | -0.08 | 0.38 | 1.38 |
| RILPL2   | 196383    | -0.23 | -0.54 | -1.54 | CDKN2AIP | 55602  | 0.43  | 0.61 | 1.38 |
| FABP5    | 2171      | -0.21 | -1.1  | -1.53 | CPEB2    | 132864 | 0.35  | 0.7  | 1.38 |
| NEURL    | 9148      | 0.11  | -0.25 | -1.53 | NIPA1    | 123606 | 0.45  | 0.84 | 1.38 |
| HOXC4    | 3221      | 0.12  | -0.17 | -1.53 | PLCXD2   | 257068 | 0.29  | 0.85 | 1.38 |
| CASP6    | 839       | -0.73 | -0.87 | -1.53 | TMEM189  | 387521 | 0.4   | 0.97 | 1.38 |
| C22ORF36 | 388886    | -0.08 | -0.68 | -1.53 | ANXA5    | 308    | 0.23  | 0.38 | 1.37 |

|              |           |       |       |       |              |           |       |       |      |
|--------------|-----------|-------|-------|-------|--------------|-----------|-------|-------|------|
| SLC24A6      | 80024     | -0.02 | -0.59 | -1.53 | NPTX1        | 4884      | 0.1   | 0.65  | 1.37 |
| RAB26        | 25837     | -0.22 | -1.25 | -1.53 | CDC25A       | 993       | 0.12  | 0.16  | 1.37 |
| ANAPC4       | 29945     | -0.68 | -1.17 | -1.53 | SLC35D1      | 23169     | 0.47  | 1.19  | 1.37 |
| C6ORF203     | 51250     | -0.55 | -0.78 | -1.53 | GALNT2       | 2590      | 0.38  | 0.76  | 1.37 |
| CD99L2       | 83692     | -0.22 | -1.08 | -1.53 | RBM22        | 55696     | 0.3   | 0.62  | 1.37 |
| LOC100293090 | 100293090 | -0.16 | -0.74 | -1.53 | CSGALNACT2   | 55454     | 0.26  | 0.87  | 1.37 |
| MIB1         | 57534     | -0.1  | -0.54 | -1.53 | LOC727847    | 727847    | 0.54  | 0.59  | 1.37 |
| PELI3        | 246330    | -1.19 | -1.05 | -1.53 | CKS2         | 1164      | 0.42  | 0.32  | 1.36 |
| NIPSNAP1     | 8508      | 0.13  | -0.63 | -1.52 | DOCK4        | 9732      | -0.04 | 0.67  | 1.36 |
| TMEM80       | 283232    | 0.12  | -1.13 | -1.52 | PPP3CC       | 5533      | 0.46  | 0.75  | 1.36 |
| C20ORF96     | 140680    | -0.53 | -0.94 | -1.52 | MTSS1L       | 92154     | 0.02  | 0.57  | 1.36 |
| LOC100131564 | 100131564 | -0.36 | -0.27 | -1.52 | FAM184A      | 79632     | 0.42  | 0.25  | 1.36 |
| LOC158863    | 158863    | -0.71 | -0.63 | -1.52 | ANGPTL4      | 51129     | 1.04  | 1.35  | 1.36 |
| GSTA4        | 2941      | -0.01 | -0.95 | -1.51 | C7ORF20      | 51608     | -0.3  | 0.48  | 1.36 |
| CDK5         | 1020      | 0.21  | -0.64 | -1.51 | TDG          | 6996      | 0.22  | 0.54  | 1.35 |
| ASB9         | 140462    | 0.18  | -1.1  | -1.51 | LIMA1        | 51474     | 0.03  | 0     | 1.35 |
| NSMCE4A      | 54780     | -0.11 | -0.99 | -1.51 | SLC25A37     | 51312     | 0.48  | 1.02  | 1.35 |
| MOCS2        | 4338      | -0.42 | -0.76 | -1.51 | TMEM22       | 80723     | 0.28  | 0.89  | 1.35 |
| ZDHHC4       | 55146     | -0.25 | -0.51 | -1.51 | CCNL1        | 57018     | 0.22  | 0.45  | 1.35 |
| ZCWPW1       | 55063     | -0.16 | -0.9  | -1.51 | SBDSP        | 155370    | 0.31  | 0.89  | 1.35 |
| TMEM117      | 84216     | -0.4  | -0.97 | -1.51 | DDI2         | 84301     | 0.1   | 0.49  | 1.35 |
| LOC100133923 | 100133923 | -0.71 | -0.82 | -1.51 | LOC100131254 | 100131254 | -0.05 | -0.01 | 1.35 |
| FANCG        | 2189      | -0.15 | -0.97 | -1.5  | THEM5        | 284486    | -0.09 | -0.04 | 1.35 |
| MTMR15       | 22909     | -0.26 | -0.67 | -1.5  | FOXF2        | 2295      | 0.03  | 0.6   | 1.34 |
| PPOX         | 5498      | -0.02 | -0.35 | -1.5  | PLA2G4C      | 8605      | 0.12  | 0.84  | 1.34 |
| LHX2         | 9355      | -0.2  | -1.38 | -1.5  | MTO1         | 25821     | 0.31  | 0.85  | 1.34 |
| PHKA2        | 5256      | -0.08 | -0.92 | -1.5  | SSH1         | 54434     | 0.13  | 0.52  | 1.34 |
| C14ORF133    | 63894     | -0.69 | -1.1  | -1.5  | PEAR1        | 375033    | 0.2   | 0.82  | 1.34 |
| NOL12        | 79159     | -0.92 | -1.39 | -1.5  | APCDD1L      | 164284    | 0.45  | 0.39  | 1.34 |
| C17ORF90     | 339229    | -0.56 | -0.59 | -1.5  | PSMC3IP      | 29893     | -0.16 | 0.66  | 1.33 |
| ANKS6        | 203286    | -0.51 | -0.54 | -1.5  | SKIL         | 6498      | 0.78  | 0.88  | 1.33 |

|           |        |       |       |       |              |           |       |      |      |
|-----------|--------|-------|-------|-------|--------------|-----------|-------|------|------|
| PPIL3     | 53938  | 0.23  | -0.86 | -1.5  | ELOVL1       | 64834     | 0.36  | 0.86 | 1.33 |
| HSD17B4   | 3295   | -0.04 | -1.19 | -1.49 | PAPOLG       | 64895     | 0.33  | 0.7  | 1.33 |
| XRCC1     | 7515   | -0.29 | -0.88 | -1.49 | FJX1         | 24147     | -0.01 | 0.12 | 1.33 |
| MC1R      | 4157   | -0.19 | -0.98 | -1.49 | CNNM3        | 26505     | 0.54  | 1.08 | 1.33 |
| GPS2      | 2874   | -0.56 | -1.1  | -1.49 | STAMBPL1     | 57559     | 0.42  | 1.08 | 1.33 |
| C9ORF125  | 84302  | -0.64 | -1.17 | -1.49 | MTHFD1L      | 25902     | 0.16  | 0.97 | 1.33 |
| NDRG3     | 57446  | -0.28 | -0.52 | -1.49 | PHF5A        | 84844     | 0.39  | 0.95 | 1.33 |
| RNF43     | 54894  | -0.41 | -0.72 | -1.49 | PWWP2A       | 114825    | 0.53  | 0.52 | 1.33 |
| FERMT1    | 55612  | -0.49 | -0.64 | -1.49 | PPP2CB       | 5516      | 0.08  | 0.57 | 1.32 |
| MNS1      | 55329  | -0.4  | -1.37 | -1.49 | RIOK3        | 8780      | -0.27 | 0.55 | 1.32 |
| C12ORF52  | 84934  | -0.33 | -1.11 | -1.49 | SRF          | 6722      | -0.15 | 0.59 | 1.32 |
| ZNF30     | 90075  | -0.5  | -0.71 | -1.49 | MKLN1        | 4289      | 0.28  | 0.76 | 1.32 |
| TARBP1    | 6894   | 0.09  | -1    | -1.48 | NUPL1        | 9818      | 0.16  | 0.62 | 1.32 |
| RFX5      | 5993   | 0     | -0.58 | -1.48 | NFKB2        | 4791      | 0.33  | 0.62 | 1.32 |
| HMBS      | 3145   | -0.2  | -0.63 | -1.48 | MYEOV        | 26579     | 0.72  | 0.98 | 1.32 |
| OXSM      | 54995  | -0.46 | -0.53 | -1.48 | HBEGF        | 1839      | -0.01 | 0.35 | 1.31 |
| C18ORF22  | 79863  | 0.01  | -0.59 | -1.48 | TSC22D2      | 9819      | 0.36  | 0.37 | 1.31 |
| ITFG3     | 83986  | 0.25  | -0.3  | -1.48 | NR4A2        | 4929      | 1.03  | 0.74 | 1.31 |
| MBLAC2    | 153364 | -0.18 | -0.14 | -1.48 | TCF7L2       | 6934      | 0.44  | 0.8  | 1.31 |
| OAZ2      | 4947   | 0     | -1.2  | -1.47 | CDKN1C       | 1028      | 0.55  | 0.81 | 1.31 |
| DHCR7     | 1717   | 0.21  | -1.31 | -1.47 | LOC100130721 | 100130721 | 0.39  | 1.18 | 1.31 |
| ACAA1     | 30     | -0.05 | -0.62 | -1.47 | LOC100130996 | 100130996 | 0.18  | 0.61 | 1.31 |
| CSK       | 1445   | -0.47 | -0.64 | -1.47 | SETD7        | 80854     | -0.02 | 0.63 | 1.31 |
| LOC644450 | 644450 | -0.43 | -0.48 | -1.47 | LOC387647    | 387647    | -0.11 | 0.4  | 1.31 |
| DPH5      | 51611  | 0     | -0.33 | -1.47 | GATA3        | 2625      | 0.47  | 0.77 | 1.3  |
| RTN4IP1   | 84816  | -0.23 | -0.61 | -1.47 | MT2A         | 4502      | 0.48  | 1.23 | 1.3  |
| ATP6V1E2  | 90423  | -0.08 | -0.09 | -1.47 | OTUD7B       | 56957     | 0.4   | 0.73 | 1.3  |
| PAFAH1B3  | 5050   | -0.05 | -0.92 | -1.46 | BOD1         | 91272     | 0.34  | 0.95 | 1.3  |
| MYO5A     | 4644   | -0.55 | -1.23 | -1.46 | MED30        | 90390     | 0.41  | 0.85 | 1.3  |
| SOX21     | 11166  | 0.47  | -0.74 | -1.46 | TP53INP2     | 58476     | 0.25  | 0.73 | 1.3  |
| CREB3L4   | 148327 | -0.15 | -0.92 | -1.46 | FLJ42969     | 441374    | 0.33  | 0.39 | 1.3  |

|            |           |       |       |       |           |        |       |      |      |
|------------|-----------|-------|-------|-------|-----------|--------|-------|------|------|
| NAPEPLD    | 22236     | 0.14  | -0.73 | -1.46 | SPEN      | 23013  | 0.12  | 0.65 | 1.29 |
| FAM78A     | 286336    | -0.19 | -1.22 | -1.46 | NRAS      | 4893   | 0.4   | 0.85 | 1.29 |
| C20ORF118  | 140711    | -1.11 | -1.22 | -1.46 | PSEN1     | 5663   | 0.12  | 0.89 | 1.29 |
| SNPH       | 9751      | 0.26  | -0.36 | -1.45 | GOLGA2    | 2801   | 0.08  | 0.57 | 1.29 |
| CRYAB      | 1410      | 0.43  | -1.02 | -1.45 | TLE3      | 7090   | 0.31  | 0.81 | 1.29 |
| MIIP       | 60672     | -0.43 | -0.58 | -1.45 | DOHH      | 83475  | 0.22  | 0.65 | 1.29 |
| FAM59A     | 64762     | -0.69 | -0.88 | -1.45 | QSOX2     | 169714 | 0.44  | 1    | 1.29 |
| FBXO25     | 26260     | -0.75 | -1.28 | -1.45 | ZSWIM6    | 57688  | 0.07  | 0.27 | 1.29 |
| METTL12    | 751071    | -0.32 | -0.52 | -1.45 | LOC645978 | 645978 | -0.16 | 0.42 | 1.29 |
| NCRNA00173 | 100287569 | -0.35 | -0.55 | -1.45 | MNT       | 4335   | 0.8   | 0.9  | 1.28 |
| HSP90AB5P  | 442083    | -0.09 | -1.39 | -1.45 | RFX1      | 5989   | 0.78  | 0.78 | 1.28 |
| GCLC       | 2729      | -0.58 | -1.18 | -1.44 | CXCL11    | 6373   | -0.08 | 0.2  | 1.28 |
| LTA4H      | 4048      | 0.08  | -0.53 | -1.44 | CLK1      | 1195   | 0.9   | 0.97 | 1.28 |
| ZC3H4      | 23211     | -0.8  | -0.74 | -1.44 | ZIC5      | 85416  | 0.49  | 0.89 | 1.28 |
| NAT1       | 9         | -0.59 | -0.83 | -1.44 | CPNE8     | 144402 | 0.49  | 0.59 | 1.28 |
| RASSF4     | 83937     | -0.2  | -0.6  | -1.44 | EIF2C2    | 27161  | 0.21  | 0.53 | 1.28 |
| MTIF3      | 219402    | 0.06  | -0.5  | -1.44 | WIPF1     | 7456   | 0.25  | 0.82 | 1.27 |
| PEBP1      | 5037      | 0.02  | -0.79 | -1.43 | SS18      | 6760   | 0.04  | 0.44 | 1.27 |
| BPHL       | 670       | -0.15 | -1    | -1.43 | RYK       | 6259   | 0.05  | 0.71 | 1.27 |
| POLDIP2    | 26073     | -0.27 | -0.83 | -1.43 | ARHGEF17  | 9828   | 0.06  | 0.72 | 1.27 |
| MLPH       | 79083     | -0.78 | -0.78 | -1.43 | SPAG9     | 9043   | 0.15  | 0.37 | 1.27 |
| ZNF771     | 51333     | -0.29 | -0.69 | -1.43 | PINK1     | 65018  | 0.36  | 1.04 | 1.27 |
| IFT172     | 26160     | -0.28 | -0.45 | -1.43 | ATAD2B    | 54454  | 0.14  | 0.57 | 1.27 |
| VSIG10L    | 147645    | 0.13  | -0.94 | -1.43 | C1ORF69   | 200205 | -0.25 | 0.21 | 1.27 |
| TIGD2      | 166815    | -0.74 | -0.85 | -1.43 | C16ORF61  | 56942  | 0.32  | 0.82 | 1.27 |
| LCMT2      | 9836      | -1.2  | -0.92 | -1.42 | MIS12     | 79003  | -0.04 | 0.66 | 1.27 |
| DZIP1      | 22873     | -0.44 | -1.01 | -1.42 | KLC3      | 147700 | 0.01  | 0.39 | 1.27 |
| SLC4A11    | 83959     | -0.62 | -1.14 | -1.42 | VDR       | 7421   | 0.61  | 0.8  | 1.26 |
| STOX2      | 56977     | -0.76 | -1.07 | -1.42 | BDNF      | 627    | 0.35  | 0.72 | 1.26 |
| CACYBP     | 27101     | -0.19 | -1.15 | -1.41 | SMTN      | 6525   | -0.02 | 0.32 | 1.26 |
| KIAA0196   | 9897      | -0.32 | -0.84 | -1.41 | MCAM      | 4162   | 0.21  | 0.18 | 1.26 |



|              |           |       |       |       |              |           |       |      |      |
|--------------|-----------|-------|-------|-------|--------------|-----------|-------|------|------|
| GPR162       | 27239     | -0.02 | -1.02 | -1.41 | FAF2         | 23197     | -0.08 | 0.57 | 1.26 |
| CPLX2        | 10814     | -0.15 | -0.74 | -1.41 | E2F5         | 1875      | 0.11  | 0.64 | 1.26 |
| HYAL2        | 8692      | 0.31  | -0.85 | -1.41 | C9ORF21      | 195827    | 0.28  | 0.87 | 1.26 |
| DBNL         | 28988     | -0.53 | -1.02 | -1.41 | HIST4H4      | 121504    | 0.2   | 0.81 | 1.26 |
| CLDN23       | 137075    | -0.66 | -0.66 | -1.41 | LOC728868    | 728868    | 0.33  | 0.61 | 1.26 |
| PRSS36       | 146547    | 0.33  | -0.2  | -1.41 | LOC730167    | 730167    | 0.21  | 0.96 | 1.26 |
| ADCK5        | 203054    | -0.25 | -1.15 | -1.41 | SLC36A4      | 120103    | 0.51  | 1.18 | 1.26 |
| GTF3A        | 2971      | 0.07  | -0.43 | -1.4  | ZNRD1        | 30834     | 0.34  | 0.95 | 1.26 |
| GALT         | 2592      | -0.22 | -0.76 | -1.4  | LOC389831    | 389831    | 0.17  | 0.36 | 1.26 |
| CCDC6        | 8030      | -0.51 | -0.81 | -1.4  | ATG9A        | 79065     | 0.15  | 0.8  | 1.25 |
| MSTO1        | 55154     | -0.76 | -1.24 | -1.4  | PCF11        | 51585     | -0.28 | 0.45 | 1.25 |
| NUBPL        | 80224     | -0.1  | -0.78 | -1.4  | RBBP6        | 5930      | 0.14  | 0.51 | 1.25 |
| EMILIN2      | 84034     | -0.42 | -0.86 | -1.4  | DRD4         | 1815      | 0.56  | 1.09 | 1.25 |
| DNAJC30      | 84277     | -0.62 | -0.93 | -1.4  | DLC1         | 10395     | 0.1   | 0.87 | 1.25 |
| FAM81A       | 145773    | 0.02  | -0.59 | -1.4  | UBTD1        | 80019     | 0.4   | 0.59 | 1.25 |
| C11ORF74     | 119710    | 0.23  | -0.44 | -1.4  | LOC57399     | 57399     | 0.55  | 0.95 | 1.25 |
| NCOA7        | 135112    | 0.13  | -0.32 | -1.4  | LOC100129110 | 100129110 | 0.14  | 0.29 | 1.25 |
| FASTK        | 10922     | -0.21 | -0.67 | -1.39 | RPRD1B       | 58490     | -0.34 | 0.48 | 1.25 |
| TNFRSF1A     | 7132      | 0.55  | -0.4  | -1.39 | DDX3X        | 1654      | 0.3   | 0.61 | 1.24 |
| CETN3        | 1070      | 0.15  | -0.28 | -1.39 | ZFP36        | 7538      | 0.8   | 0.53 | 1.24 |
| TMEM159      | 57146     | 0.12  | -0.56 | -1.39 | RYBP         | 23429     | 0.37  | 0.62 | 1.24 |
| MRPL20       | 55052     | -0.19 | -1.04 | -1.39 | PLEKHO2      | 80301     | 0.07  | 0.18 | 1.24 |
| LOC80154     | 80154     | -0.01 | -0.76 | -1.39 | ACYP1        | 97        | 0.7   | 1.23 | 1.24 |
| CCT3         | 7203      | -0.19 | -1.22 | -1.38 | CBL          | 867       | 0.13  | 0.53 | 1.24 |
| C5ORF13      | 9315      | -0.17 | -1.09 | -1.38 | CREM         | 1390      | 0.37  | 0.78 | 1.24 |
| ARSE         | 415       | -0.15 | -0.51 | -1.38 | POGZ         | 23126     | 0.18  | 0.51 | 1.24 |
| STX2         | 2054      | -0.82 | -1.13 | -1.38 | C20ORF4      | 25980     | 0.19  | 0.48 | 1.24 |
| RARS2        | 57038     | -0.34 | -1.16 | -1.38 | CNNM4        | 26504     | 0.42  | 1    | 1.24 |
| APBA2        | 321       | -0.18 | -0.72 | -1.38 | LINS1        | 55180     | 0.16  | 0.32 | 1.24 |
| IFT81        | 28981     | -0.02 | -0.88 | -1.38 | FBXL12       | 54850     | 0.38  | 0.49 | 1.24 |
| LOC100288578 | 100288578 | -0.39 | -0.69 | -1.38 | C5ORF32      | 84418     | 0.42  | 0.94 | 1.24 |

|              |           |       |       |       |              |           |       |      |      |
|--------------|-----------|-------|-------|-------|--------------|-----------|-------|------|------|
| BBS2         | 583       | 0.28  | -0.14 | -1.38 | PGM5P1       | 653394    | -0.21 | 0.32 | 1.24 |
| LOC100293352 | 100293352 | -1.44 | -1.29 | -1.38 | BECN1L1      | 441925    | 0.88  | 0.96 | 1.24 |
| ADD3         | 120       | -0.13 | -0.85 | -1.37 | SHOC2        | 8036      | 0.2   | 0.57 | 1.23 |
| DDX28        | 55794     | -0.73 | -0.85 | -1.37 | RAB30        | 27314     | -0.26 | 0.36 | 1.23 |
| ITGB4        | 3691      | 0.01  | -0.05 | -1.37 | TUBB6        | 84617     | 0.08  | 0.28 | 1.23 |
| ANKRD7       | 56311     | -1.19 | -1.01 | -1.37 | STARD13      | 90627     | 0.13  | 0.29 | 1.23 |
| TSKU         | 25987     | -0.18 | -0.39 | -1.37 | ARPP19       | 10776     | 0.2   | 0.66 | 1.23 |
| C14ORF132    | 56967     | 0.08  | -0.74 | -1.37 | KIAA1644     | 85352     | 0.08  | 0.61 | 1.23 |
| LOC100170939 | 100170939 | -0.55 | -0.59 | -1.37 | LOC100129138 | 100129138 | 0.46  | 0.8  | 1.23 |
| MAPKAPK3     | 7867      | -0.29 | -0.93 | -1.36 | WDR20        | 91833     | 0.44  | 0.59 | 1.23 |
| ACOT13       | 55856     | 0.15  | -0.5  | -1.36 | IGF2BP1      | 10642     | -0.04 | 0.35 | 1.23 |
| HMMR         | 3161      | -0.23 | -0.72 | -1.36 | TMEM184B     | 25829     | 0.22  | 0.63 | 1.22 |
| FSD1         | 79187     | 0.03  | -0.52 | -1.36 | DGCR2        | 9993      | 0.46  | 0.62 | 1.22 |
| HSPC157      | 29092     | 0.19  | -0.52 | -1.36 | GSK3A        | 2931      | 0.38  | 0.48 | 1.22 |
| C15ORF38     | 348110    | -0.2  | -0.79 | -1.36 | WBP4         | 11193     | -0.36 | 0.6  | 1.22 |
| EME1         | 146956    | -0.53 | -0.9  | -1.36 | TAPT1        | 202018    | 0.04  | 0.63 | 1.22 |
| NOTCH2       | 4853      | -0.34 | -0.93 | -1.35 | KLB          | 152831    | 0.18  | 0.75 | 1.22 |
| LEPREL2      | 10536     | 0.06  | -0.43 | -1.35 | MIER1        | 57708     | 0.28  | 0.58 | 1.22 |
| AGBL5        | 60509     | -0.42 | -0.88 | -1.35 | LOC100133862 | 100133862 | 0.11  | 0.26 | 1.22 |
| FAM82B       | 51115     | 0.01  | -0.43 | -1.35 | CKS1B        | 1163      | 0.23  | 0.91 | 1.21 |
| FAM120AOS    | 158293    | -0.71 | -1.16 | -1.35 | CAV2         | 858       | 0.4   | 0.88 | 1.21 |
| RFXANK       | 8625      | -0.28 | -0.7  | -1.34 | ELL          | 8178      | 0.22  | 0.36 | 1.21 |
| B3GNT1       | 11041     | 0.55  | 0.19  | -1.34 | ADRB2        | 154       | 0.14  | 0.68 | 1.21 |
| SLC27A2      | 11001     | -0.01 | -1.03 | -1.34 | NFKB1        | 4790      | 0.1   | 0.49 | 1.21 |
| SCNM1        | 79005     | -0.58 | -0.98 | -1.34 | PARD6B       | 84612     | 0.39  | 0.76 | 1.21 |
| PAAF1        | 80227     | -0.22 | -1.04 | -1.34 | DCP2         | 167227    | 0.01  | 0.56 | 1.21 |
| SLC35E3      | 55508     | -0.35 | -0.73 | -1.34 | MAP3K1       | 4214      | -0.03 | 0.45 | 1.21 |
| LOH12CR1     | 118426    | -0.12 | -0.69 | -1.34 | TM9SF3       | 56889     | 0.22  | 0.71 | 1.21 |
| RP5-1022P6.2 | 56261     | -0.47 | -0.78 | -1.34 | SLC39A1      | 27173     | 0.35  | 1.08 | 1.21 |
| C9ORF140     | 89958     | -0.31 | -0.18 | -1.34 | KLHL15       | 80311     | 0.56  | 0.63 | 1.21 |
| ZBED3        | 84327     | -0.74 | -0.5  | -1.34 | FAM19A3      | 284467    | -0.13 | 0.09 | 1.21 |

|          |        |       |       |       |           |        |       |      |      |
|----------|--------|-------|-------|-------|-----------|--------|-------|------|------|
| F8A1     | 8263   | -0.27 | -0.61 | -1.33 | POLR2D    | 5433   | -0.09 | 0.35 | 1.2  |
| FEZ1     | 9638   | -1.08 | -1.19 | -1.33 | PCDH1     | 5097   | 0.59  | 1.01 | 1.2  |
| AGGF1    | 55109  | -0.9  | -1.22 | -1.33 | JAG1      | 182    | 0.63  | 1    | 1.2  |
| CCNI     | 10983  | -0.19 | -0.57 | -1.33 | HMGXB3    | 22993  | -0.02 | 0.12 | 1.2  |
| ORC3L    | 23595  | -0.38 | -0.92 | -1.33 | ETNK1     | 55500  | 0.74  | 0.52 | 1.2  |
| TMEM97   | 27346  | -0.33 | -1.21 | -1.33 | SEMA4C    | 54910  | 0.35  | 0.62 | 1.2  |
| FAM55C   | 91775  | -0.19 | -0.74 | -1.33 | GFM1      | 85476  | 0.13  | 0.8  | 1.2  |
| EHD3     | 30845  | -0.36 | -0.51 | -1.33 | MYEF2     | 50804  | 0.01  | 0.65 | 1.2  |
| ODF3L2   | 284451 | -0.07 | -0.6  | -1.33 | C10ORF35  | 219738 | 0.39  | 1.03 | 1.2  |
| ZNF25    | 219749 | -0.31 | -0.84 | -1.33 | IKBIP     | 121457 | 0.32  | 0.81 | 1.2  |
| FLJ45248 | 401472 | 0.14  | -0.89 | -1.33 | C5ORF40   | 408263 | 0.54  | 0.61 | 1.2  |
| PLEKHG4  | 25894  | -0.02 | -0.89 | -1.33 | LOC550112 | 550112 | -0.6  | 0.52 | 1.2  |
| IGBP1    | 3476   | 0.08  | -0.77 | -1.32 | MAP2K1    | 5604   | 0.28  | 0.77 | 1.19 |
| CDC16    | 8881   | -0.72 | -0.74 | -1.32 | RARA      | 5914   | 0.66  | 0.81 | 1.19 |
| SFRS5    | 6430   | -0.9  | -0.85 | -1.32 | VNN2      | 8875   | 0.09  | 0.65 | 1.19 |
| AKR1C1   | 1645   | -0.16 | -0.48 | -1.32 | EIF2B5    | 8893   | 0.03  | 0.68 | 1.19 |
| APC2     | 10297  | -0.02 | -0.73 | -1.32 | RC3H1     | 149041 | 0.34  | 0.7  | 1.19 |
| PNMA2    | 10687  | -0.49 | -0.66 | -1.32 | DUSP10    | 11221  | 0.19  | 0.56 | 1.19 |
| ACAT2    | 39     | 0.13  | -1.1  | -1.32 | BRF2      | 55290  | 0.36  | 0.74 | 1.19 |
| PLA2G4A  | 5321   | 0.22  | -0.64 | -1.32 | CA10      | 56934  | 0.24  | 0.21 | 1.19 |
| GGTLC1   | 92086  | -0.14 | -0.49 | -1.32 | SH2D5     | 400745 | -0.24 | 0.21 | 1.19 |
| KIAA0485 | 57235  | -0.1  | -0.53 | -1.32 | BNIP1     | 662    | 0.14  | 0.82 | 1.18 |
| MRPS33   | 51650  | 0.01  | -0.46 | -1.32 | SCML2     | 10389  | 0.19  | 0.59 | 1.18 |
| ARMCX1   | 51309  | -0.41 | -0.54 | -1.32 | DLX2      | 1746   | 0.14  | 0.05 | 1.18 |
| NPEPL1   | 79716  | -0.07 | -0.38 | -1.32 | DDAH1     | 23576  | 0.05  | 0.19 | 1.18 |
| MREG     | 55686  | -1.16 | -0.9  | -1.32 | CCDC28A   | 25901  | 0.36  | 0.7  | 1.18 |
| WNT3     | 7473   | -0.08 | -0.99 | -1.32 | AVL9      | 23080  | 0.14  | 0.82 | 1.18 |
| LCMT1    | 51451  | 0     | -0.63 | -1.32 | SATB2     | 23314  | 0.52  | 0.69 | 1.18 |
| GANC     | 2595   | -0.25 | -0.98 | -1.32 | GGNBP2    | 79893  | 0.36  | 0.52 | 1.18 |
| FILIP1   | 27145  | -0.14 | -0.54 | -1.32 | ALG14     | 199857 | 0.34  | 0.72 | 1.18 |
| TCEAL8   | 90843  | 0.12  | -0.53 | -1.32 | ANKRD33B  | 651746 | 0.42  | 0.8  | 1.18 |

|              |           |       |       |       |              |           |       |       |      |
|--------------|-----------|-------|-------|-------|--------------|-----------|-------|-------|------|
| LOC643988    | 643988    | 0.03  | -1.29 | -1.32 | ZCCHC3       | 85364     | 0.32  | 0.68  | 1.18 |
| STAT1        | 6772      | 0.24  | -0.64 | -1.31 | ARL5C        | 390790    | 0.03  | 0.31  | 1.18 |
| RASSF2       | 9770      | -0.26 | -0.95 | -1.31 | C21ORF121    | 150142    | 0.06  | 0.25  | 1.18 |
| HISPPD1      | 23262     | -0.02 | -0.39 | -1.31 | CTDSPL2      | 51496     | 0.01  | 0.46  | 1.18 |
| NDUFAF3      | 25915     | -0.01 | -0.98 | -1.31 | VKORC1L1     | 154807    | 0.28  | 0.53  | 1.18 |
| ZNF688       | 146542    | -0.43 | -0.98 | -1.31 | PXN          | 5829      | 0.31  | 0.7   | 1.17 |
| ARRB1        | 408       | -0.46 | -1.19 | -1.31 | KIAA0408     | 9729      | 0.18  | 0.79  | 1.17 |
| C8ORF30A     | 51236     | -0.41 | -0.72 | -1.31 | CRLF1        | 9244      | 0.28  | 0.79  | 1.17 |
| ZNF839       | 55778     | -0.55 | -0.91 | -1.31 | ANKLE2       | 23141     | -0.17 | 0.05  | 1.17 |
| THNSL1       | 79896     | -0.8  | -1.02 | -1.31 | PHLPP2       | 23035     | 0.07  | 0.36  | 1.17 |
| PPA2         | 27068     | 0.02  | -0.48 | -1.31 | PTRH2        | 51651     | 0.01  | 0.34  | 1.17 |
| SCARNA17     | 677769    | -0.48 | -0.81 | -1.31 | EDA2R        | 60401     | 0.06  | 0.61  | 1.17 |
| LOC100133487 | 100133487 | 0.56  | -0.48 | -1.31 | DPH3         | 285381    | 0.1   | 0.77  | 1.17 |
| NAV1         | 89796     | 0.58  | -0.29 | -1.31 | RRM2B        | 50484     | 0.39  | 0.91  | 1.17 |
| PLCE1        | 51196     | -0.08 | -0.74 | -1.3  | ZNF697       | 90874     | 0.3   | 0.67  | 1.17 |
| PECR         | 55825     | 0.07  | -0.58 | -1.3  | WWTR1        | 25937     | 0.62  | 0.36  | 1.16 |
| SIRT3        | 23410     | 0.05  | -0.54 | -1.3  | E2F4         | 1874      | -0.09 | 0.63  | 1.16 |
| C7ORF70      | 84792     | -0.34 | -0.62 | -1.3  | SMAD3        | 4088      | 0.2   | 0.69  | 1.16 |
| C9ORF103     | 414328    | -0.4  | -0.71 | -1.3  | ZNF136       | 7695      | -0.16 | 0.48  | 1.16 |
| DTNBP1       | 84062     | -0.53 | -0.7  | -1.3  | GAR1         | 54433     | -0.06 | 0.45  | 1.16 |
| LOC222070    | 222070    | -0.35 | -0.75 | -1.3  | C10ORF110    | 55853     | -0.67 | 0.42  | 1.16 |
| PRELID2      | 153768    | -0.29 | -0.72 | -1.3  | ARL8A        | 127829    | 0.3   | 0.72  | 1.16 |
| ZBTB47       | 92999     | -0.22 | -0.43 | -1.3  | KSR2         | 283455    | 0.42  | 1     | 1.16 |
| PDCD2        | 5134      | -0.41 | -0.49 | -1.29 | LIX1L        | 128077    | 0.59  | 0.96  | 1.16 |
| HOXB5        | 3215      | -0.3  | -0.81 | -1.29 | SKA2         | 348235    | 0.23  | 0.83  | 1.16 |
| SLC3A1       | 6519      | -0.46 | -1.08 | -1.29 | ELOVL7       | 79993     | 0.2   | 0.34  | 1.16 |
| HOXA7        | 3204      | -0.28 | -0.44 | -1.29 | LOC100127961 | 100127961 | 0.28  | 0.31  | 1.16 |
| CDON         | 50937     | 0.06  | -0.66 | -1.29 | NHS          | 4810      | -0.22 | 0.24  | 1.16 |
| C17ORF62     | 79415     | -0.46 | -1.13 | -1.29 | OR4E2        | 26686     | -0.09 | -0.06 | 1.16 |
| ZDHHC6       | 64429     | -0.43 | -1.19 | -1.29 | HCCS         | 3052      | 0.07  | 0.68  | 1.15 |
| TFCP2L1      | 29842     | -0.92 | -1.21 | -1.29 | LARS2        | 23395     | 0.31  | 0.46  | 1.15 |

|              |           |       |       |       |          |        |       |       |      |
|--------------|-----------|-------|-------|-------|----------|--------|-------|-------|------|
| BAT4         | 7918      | -0.61 | -0.87 | -1.29 | SCG2     | 7857   | 0.52  | 0.95  | 1.15 |
| VPS36        | 51028     | -0.11 | -0.74 | -1.29 | WDR45L   | 56270  | -0.18 | 0.42  | 1.15 |
| PYDC1        | 260434    | -0.09 | -0.44 | -1.29 | ZFP36L1  | 677    | 0.4   | 0.56  | 1.15 |
| LOC729421    | 729421    | -0.18 | -0.01 | -1.29 | PTPLB    | 201562 | 0.16  | 0.68  | 1.15 |
| PEX11B       | 8799      | -0.21 | -0.66 | -1.28 | LIN7B    | 64130  | 0.43  | 0.37  | 1.15 |
| SEMA3B       | 7869      | -0.27 | -0.74 | -1.28 | DOLPP1   | 57171  | 0.35  | 0.67  | 1.15 |
| SLC22A3      | 6581      | -0.41 | -1.15 | -1.28 | TMEM126A | 84233  | 0.15  | 0.57  | 1.15 |
| PCYT2        | 5833      | -0.09 | -1.12 | -1.28 | B3GAT2   | 135152 | 0.15  | 0.39  | 1.15 |
| SEC14L4      | 284904    | -0.88 | -1.15 | -1.28 | KLHL21   | 9903   | -0.59 | 0.42  | 1.14 |
| IL22RA1      | 58985     | -0.44 | -1.01 | -1.28 | RAMP3    | 10268  | 0.55  | 0.75  | 1.14 |
| LOC283861    | 283861    | -0.56 | -0.98 | -1.28 | GFRA1    | 2674   | 0.34  | 0.52  | 1.14 |
| SCARNA12     | 677777    | -0.16 | -0.9  | -1.28 | CFLAR    | 8837   | 0.03  | 0.53  | 1.14 |
| LOC147727    | 147727    | 0.2   | -0.53 | -1.28 | EHD4     | 30844  | 0.14  | 0.6   | 1.14 |
| RDM1         | 201299    | 0.23  | -0.95 | -1.28 | FAM18B   | 51030  | 0.3   | 0.78  | 1.14 |
| MRPL40       | 64976     | 0     | -0.71 | -1.27 | SLC25A22 | 79751  | 0.28  | 0.59  | 1.14 |
| GALK1        | 2584      | 0.1   | -0.38 | -1.27 | GLTP     | 51228  | 0.27  | 0.66  | 1.14 |
| BRE          | 9577      | -0.15 | -0.75 | -1.27 | HSPBAP1  | 79663  | 0.25  | 0.77  | 1.14 |
| GABRA5       | 2558      | -0.15 | -0.7  | -1.27 | C1ORF128 | 57095  | -0.03 | 0.49  | 1.14 |
| TELO2        | 9894      | -0.62 | -1.18 | -1.27 | FBXO33   | 254170 | 0.33  | 0.62  | 1.14 |
| GINS4        | 84296     | -0.46 | -0.62 | -1.27 | ZBTB2    | 57621  | 0.17  | 0.51  | 1.14 |
| FZD8         | 8325      | 0.55  | 0.27  | -1.27 | ZNF776   | 284309 | -0.04 | 0.5   | 1.14 |
| RNASEN       | 29102     | -0.3  | -0.72 | -1.27 | FAM161B  | 145483 | -0.25 | -0.06 | 1.14 |
| NARS2        | 79731     | -0.04 | -0.22 | -1.27 | OR5J2    | 282775 | -0.28 | 0.04  | 1.14 |
| CISH         | 1154      | 0.05  | -0.83 | -1.27 | BZW1     | 9689   | 0.48  | 0.34  | 1.13 |
| SBK1         | 388228    | -0.34 | -1.08 | -1.27 | NCBP2    | 22916  | 0.12  | 0.64  | 1.13 |
| SCRN2        | 90507     | -0.02 | -0.61 | -1.27 | LYST     | 1130   | -0.09 | 0.05  | 1.13 |
| HOXD8        | 3234      | 0.24  | -0.26 | -1.27 | LSM1     | 27257  | 0.24  | 0.74  | 1.13 |
| KRTAP19-2    | 337969    | 0.32  | -0.12 | -1.27 | ACVR2A   | 92     | 0.22  | 0.45  | 1.13 |
| LOC100131829 | 100131829 | 0.2   | -0.64 | -1.27 | FCER2    | 2208   | -0.25 | -0.1  | 1.13 |
| FAM20C       | 56975     | 0.13  | -0.19 | -1.27 | GAL      | 51083  | 0.54  | 0.86  | 1.13 |
| FLJ27352     | 145788    | 0.15  | -0.13 | -1.27 | PMP22    | 5376   | 0.48  | 0.54  | 1.13 |

|              |           |       |       |       |               |        |       |      |      |
|--------------|-----------|-------|-------|-------|---------------|--------|-------|------|------|
| LOC120364    | 120364    | 0.1   | -0.71 | -1.27 | KBTBD2        | 25948  | 0.26  | 0.55 | 1.13 |
| ZNF252       | 286101    | -1.02 | -0.82 | -1.27 | COL4A3BP      | 10087  | 0.08  | 0.5  | 1.13 |
| MPG          | 4350      | 0.04  | -0.27 | -1.26 | LOC390595     | 390595 | 0.25  | 0.88 | 1.13 |
| TUB          | 7275      | -0.17 | -0.57 | -1.26 | PTBP1         | 5725   | 0.15  | 0.68 | 1.12 |
| FLJ40330     | 645784    | -0.52 | -0.57 | -1.26 | TP53BP2       | 7159   | -0.17 | 0.17 | 1.12 |
| SIDT2        | 51092     | -0.04 | -1.14 | -1.26 | CDKN2D        | 1032   | 0.68  | 0.89 | 1.12 |
| C1ORF35      | 79169     | 0.12  | -0.41 | -1.26 | RBM9          | 23543  | 0.19  | 0.62 | 1.12 |
| DTWD2        | 285605    | -0.3  | -0.28 | -1.26 | HECA          | 51696  | 0.18  | 0.76 | 1.12 |
| LOC344887    | 344887    | -0.41 | -0.29 | -1.26 | CHD7          | 55636  | -0.22 | 0.41 | 1.12 |
| ACAD9        | 28976     | -0.28 | -1.25 | -1.26 | MOBK2L2B      | 79817  | 0.01  | 0.7  | 1.12 |
| DOCK11       | 139818    | -0.2  | -1    | -1.26 | SERTAD3       | 29946  | 0.66  | 0.66 | 1.12 |
| LOC100132850 | 100132850 | -1.09 | -1.01 | -1.26 | B3GALTL       | 145173 | 0.5   | 0.71 | 1.12 |
| AIMP2        | 7965      | -0.43 | -0.56 | -1.25 | FAM177A1      | 283635 | 0.05  | 0.68 | 1.12 |
| EPS8         | 2059      | -0.34 | -0.89 | -1.25 | CCDC39        | 339829 | 0.2   | 0.32 | 1.12 |
| NSDHL        | 50814     | -0.26 | -1.03 | -1.25 | BIRC2         | 329    | 0.24  | 0.5  | 1.11 |
| C9ORF3       | 84909     | -0.23 | -1.18 | -1.25 | KLF9          | 687    | 0.73  | 0.99 | 1.11 |
| C14ORF159    | 80017     | 0.02  | -0.91 | -1.25 | JUND          | 3727   | 0.78  | 0.73 | 1.11 |
| FAM108A1     | 81926     | -0.18 | -0.83 | -1.25 | DDX52         | 11056  | -0.02 | 0.51 | 1.11 |
| C19ORF54     | 284325    | -0.54 | -0.73 | -1.25 | ORC6L         | 23594  | -0.26 | 0.16 | 1.11 |
| TUBBP5       | 643224    | 0.44  | 0     | -1.25 | MYL12B        | 103910 | 0.12  | 0.57 | 1.11 |
| C1ORF59      | 113802    | -0.15 | -0.58 | -1.25 | MIDN          | 90007  | 0.34  | 0.31 | 1.11 |
| LRRK2        | 120892    | -0.13 | -0.64 | -1.25 | DKFZP686D0853 | 401613 | -0.31 | 0.08 | 1.11 |
| PTGR1        | 22949     | 0.09  | -0.65 | -1.25 | TES           | 26136  | -0.04 | 0.51 | 1.1  |
| COQ5         | 84274     | -0.08 | -0.42 | -1.25 | AHR           | 196    | 0.03  | 0.18 | 1.1  |
| LOC400987    | 400987    | -0.44 | -0.46 | -1.25 | LMNA          | 4000   | 0.14  | 0.44 | 1.1  |
| LOC390282    | 390282    | 0.02  | -0.2  | -1.25 | CRCP          | 27297  | -0.22 | 0.2  | 1.1  |
| GTF2I        | 2969      | -0.29 | -1.02 | -1.24 | POFUT2        | 23275  | -0.18 | 0.27 | 1.1  |
| PYGB         | 5834      | -0.16 | -0.46 | -1.24 | CAV3          | 859    | 0.35  | 0.62 | 1.1  |
| AHSA1        | 10598     | -0.31 | -1.05 | -1.24 | SPATA2L       | 124044 | 0.48  | 0.67 | 1.1  |
| ARHGAP1      | 392       | -0.21 | -1    | -1.24 | GK2           | 2712   | 0.47  | 0.77 | 1.1  |
| PDK2         | 5164      | -0.08 | -0.88 | -1.24 | TOLLIP        | 54472  | 0.06  | 0.55 | 1.1  |

|              |           |       |       |       |              |           |       |       |      |
|--------------|-----------|-------|-------|-------|--------------|-----------|-------|-------|------|
| MMD          | 23531     | 0     | -0.71 | -1.24 | C9ORF167     | 54863     | 0.49  | 1.02  | 1.1  |
| CAST         | 831       | -0.28 | -1.04 | -1.24 | C12ORF73     | 728568    | 0.45  | 0.71  | 1.1  |
| METTL7A      | 25840     | 0.07  | -0.7  | -1.24 | FAM196B      | 100131897 | 0.29  | 0.69  | 1.1  |
| ANKRD36      | 375248    | -0.63 | -0.59 | -1.24 | MIER3        | 166968    | 0.19  | 0.45  | 1.1  |
| EVL          | 51466     | 0.19  | -0.63 | -1.24 | C7ORF40      | 285958    | -0.38 | -0.11 | 1.1  |
| FLJ10357     | 55701     | -0.34 | -0.9  | -1.24 | LOC642635    | 642635    | 0.82  | 0.77  | 1.1  |
| FRAS1        | 80144     | -0.44 | -1.12 | -1.24 | NFYC         | 4802      | 0.07  | 0.62  | 1.09 |
| C17ORF70     | 80233     | -0.25 | -0.66 | -1.24 | TMED1        | 11018     | 0.42  | 0.98  | 1.09 |
| ZNF324B      | 388569    | -0.35 | -0.78 | -1.24 | CUGBP1       | 10658     | 0.16  | 0.41  | 1.09 |
| C7ORF27      | 221927    | -0.26 | -0.6  | -1.24 | LSM6         | 11157     | 0.23  | 0.74  | 1.09 |
| KRBA1        | 84626     | -0.55 | -0.88 | -1.24 | ARHGEF15     | 22899     | 0.31  | 0.52  | 1.09 |
| LOC100131000 | 100131000 | -0.15 | -0.81 | -1.24 | ZC3H11A      | 9877      | -0.03 | 0.47  | 1.09 |
| LOC100128563 | 100128563 | -0.27 | -0.51 | -1.24 | SERPINB9     | 5272      | 0.63  | 0.71  | 1.09 |
| SSBP4        | 170463    | -0.28 | -0.52 | -1.24 | KIAA0090     | 23065     | 0.32  | 0.79  | 1.09 |
| LOC100133008 | 100133008 | 0.25  | -0.1  | -1.24 | MFAP3        | 4238      | -0.13 | 0.53  | 1.09 |
| MYO10        | 4651      | -0.33 | -0.77 | -1.23 | WBP11        | 51729     | 0.37  | 0.39  | 1.09 |
| TUSC4        | 10641     | -0.25 | -0.71 | -1.23 | GOLT1B       | 51026     | 0.12  | 0.56  | 1.09 |
| GOLIM4       | 27333     | 0.12  | -0.5  | -1.23 | C10ORF88     | 80007     | 0.2   | 0.72  | 1.09 |
| MYL5         | 4636      | -0.25 | -1.11 | -1.23 | CCDC50       | 152137    | -0.04 | 0.53  | 1.09 |
| CYB561D2     | 11068     | -0.09 | -0.81 | -1.23 | SRPR         | 6734      | 0.32  | 0.77  | 1.08 |
| FGD2         | 221472    | -1.05 | -0.94 | -1.23 | MYH11        | 4629      | 0.37  | 0.2   | 1.08 |
| MRPL24       | 79590     | 0.07  | -0.46 | -1.23 | RELA         | 5970      | 0.03  | 0.62  | 1.08 |
| PGLS         | 25796     | 0.01  | -0.49 | -1.23 | PHF1         | 5252      | 0.62  | 0.88  | 1.08 |
| GDAP1        | 54332     | -0.73 | -1.16 | -1.23 | ID3          | 3399      | 0.27  | 0.23  | 1.08 |
| BIVM         | 54841     | -0.3  | -0.85 | -1.23 | SLC12A4      | 6560      | 0.01  | 0.35  | 1.08 |
| TCAG7.1196   | 728743    | -0.25 | -0.74 | -1.23 | FAM168B      | 130074    | 0.01  | 0.5   | 1.08 |
| FLJ33630     | 644873    | -0.65 | -0.51 | -1.23 | PCID2        | 55795     | -0.11 | 0.35  | 1.08 |
| FAM127C      | 441518    | 0.03  | -0.46 | -1.23 | KIRREL       | 55243     | -0.03 | 0.36  | 1.08 |
| BTBD16       | 118663    | 0.11  | -0.71 | -1.23 | LOC100128130 | 100128130 | 0.45  | 0.62  | 1.08 |
| FBXO15       | 201456    | 0.04  | -0.93 | -1.23 | SYS1         | 90196     | 0.23  | 0.62  | 1.08 |
| FRG1B        | 284802    | -0.15 | -0.93 | -1.23 | TCAM1        | 146771    | 0.5   | 0.41  | 1.08 |

|           |        |       |       |       |           |        |       |      |      |
|-----------|--------|-------|-------|-------|-----------|--------|-------|------|------|
| RNASEH2A  | 10535  | 0.03  | -0.69 | -1.22 | LOC374890 | 374890 | 0.64  | 0.8  | 1.08 |
| SURF1     | 6834   | -0.23 | -0.74 | -1.22 | M6PR      | 4074   | 0.07  | 0.48 | 1.07 |
| SLC12A2   | 6558   | 0.07  | -0.83 | -1.22 | CYTH1     | 9267   | -0.13 | 0.52 | 1.07 |
| ICK       | 22858  | -0.64 | -0.9  | -1.22 | SMURF2    | 64750  | 0.44  | 0.88 | 1.07 |
| DDC       | 1644   | -0.5  | -1.19 | -1.22 | PTTG3P    | 26255  | 0.44  | 0.68 | 1.07 |
| DZIP3     | 9666   | -0.29 | -0.42 | -1.22 | STX6      | 10228  | 0.13  | 0.31 | 1.07 |
| MXD4      | 10608  | -0.11 | -0.89 | -1.22 | FBXL18    | 80028  | -0.31 | 0.43 | 1.07 |
| DARS2     | 55157  | -0.01 | -0.77 | -1.22 | CPSF7     | 79869  | 0.32  | 0.54 | 1.07 |
| MUS81     | 80198  | -0.74 | -1.18 | -1.22 | NOP10     | 55505  | 0.21  | 0.6  | 1.07 |
| FAM134B   | 54463  | -0.53 | -0.97 | -1.22 | C12ORF35  | 55196  | 0.05  | 0.68 | 1.07 |
| THTPA     | 79178  | -0.04 | -0.92 | -1.22 | TMEM39A   | 55254  | 0.18  | 0.37 | 1.07 |
| MSRB2     | 22921  | -0.24 | -0.63 | -1.22 | C14ORF138 | 79609  | 0.02  | 0.39 | 1.07 |
| AMDHD2    | 51005  | -0.16 | -0.6  | -1.22 | THAP9     | 79725  | 0.23  | 0.58 | 1.07 |
| RNF141    | 50862  | -0.28 | -0.47 | -1.22 | AP1S3     | 130340 | 0.4   | 1.02 | 1.07 |
| SYTL2     | 54843  | -0.16 | -0.91 | -1.22 | RG9MTD2   | 93587  | 0.4   | 0.72 | 1.07 |
| LOC91450  | 91450  | -0.4  | -0.74 | -1.22 | SLC30A7   | 148867 | 0.05  | 0.45 | 1.07 |
| NT5DC1    | 221294 | -0.11 | -0.85 | -1.22 | FIGN      | 55137  | -0.03 | 0.29 | 1.07 |
| ARV1      | 64801  | -0.32 | -0.42 | -1.22 | RNF41     | 10193  | 0.49  | 0.84 | 1.06 |
| BTBD12    | 84464  | -0.39 | -0.37 | -1.22 | MEF2D     | 4209   | 0.48  | 0.77 | 1.06 |
| MMAB      | 326625 | -0.72 | -0.81 | -1.22 | PDGFA     | 5154   | 0.3   | 0.91 | 1.06 |
| EIF3F     | 8665   | -0.1  | -0.23 | -1.21 | BTG3      | 10950  | 0.3   | 0.45 | 1.06 |
| HSPD1     | 3329   | -0.18 | -1.17 | -1.21 | DEGS1     | 8560   | 0.32  | 0.54 | 1.06 |
| TMEM66    | 51669  | 0.02  | -0.72 | -1.21 | STAT3     | 6774   | 0.24  | 0.33 | 1.06 |
| JUP       | 3728   | -0.05 | -0.47 | -1.21 | TGFB2     | 7042   | 0.27  | 0.34 | 1.06 |
| LANCL1    | 10314  | 0.09  | -0.73 | -1.21 | B4GALT3   | 8703   | 0.41  | 0.87 | 1.06 |
| ACY1      | 95     | 0.05  | -0.92 | -1.21 | ZEB1      | 6935   | 0.06  | 0.41 | 1.06 |
| MYOM2     | 9172   | -0.3  | -0.88 | -1.21 | TOR1AIP1  | 26092  | 0.38  | 0.66 | 1.06 |
| CHMP6     | 79643  | -0.25 | -0.56 | -1.21 | PPP1R14B  | 26472  | 0.13  | 0.55 | 1.06 |
| TMEM160   | 54958  | 0.13  | -0.58 | -1.21 | C16ORF80  | 29105  | -0.15 | 0.4  | 1.06 |
| TRIM45    | 80263  | -0.1  | -0.52 | -1.21 | CAPRIN2   | 65981  | 0.23  | 0.43 | 1.06 |
| C14ORF126 | 112487 | -0.06 | -0.58 | -1.21 | DRAM1     | 55332  | 0.36  | 0.56 | 1.06 |



|              |           |       |       |       |          |           |       |      |      |
|--------------|-----------|-------|-------|-------|----------|-----------|-------|------|------|
| LOC100129596 | 100129596 | 0.16  | -0.19 | -1.21 | VPS37C   | 55048     | -0.19 | 0.42 | 1.06 |
| LOC727916    | 727916    | 0.14  | -0.53 | -1.21 | ING5     | 84289     | 0.27  | 0.8  | 1.06 |
| MLKL         | 197259    | -0.71 | -0.61 | -1.21 | NIPAL1   | 152519    | -0.06 | 0.53 | 1.06 |
| AP2M1        | 1173      | -0.09 | -0.91 | -1.2  | CWC22    | 57703     | 0.17  | 0.43 | 1.06 |
| FIBP         | 9158      | -0.26 | -0.62 | -1.2  | EIF1AD   | 84285     | 0.01  | 0.08 | 1.06 |
| SC65         | 10609     | -0.06 | -0.31 | -1.2  | GNAQ     | 2776      | 0.13  | 0.49 | 1.05 |
| SPINK1       | 6690      | -1.01 | -1.1  | -1.2  | JAKMIP2  | 9832      | 0.19  | 0.41 | 1.05 |
| MSH2         | 4436      | -0.41 | -1.01 | -1.2  | PCTK2    | 5128      | 0.25  | 0.4  | 1.05 |
| ZNF32        | 7580      | -0.26 | -0.92 | -1.2  | PTS      | 5805      | 0.2   | 0.74 | 1.05 |
| TBC1D2B      | 23102     | -0.68 | -1.09 | -1.2  | VEGFC    | 7424      | 0.45  | 0.93 | 1.05 |
| SFRS2B       | 10929     | -0.69 | -1    | -1.2  | ARHGAP19 | 84986     | 0.22  | 0.28 | 1.05 |
| DERA         | 51071     | -0.17 | -0.52 | -1.2  | KRT35    | 3886      | 0.89  | 1.02 | 1.05 |
| NRN1         | 51299     | -0.63 | -0.83 | -1.2  | FA2H     | 79152     | 0.67  | 0.88 | 1.05 |
| IFT52        | 51098     | -0.19 | -0.68 | -1.2  | ASFMR1   | 100126270 | 0.5   | 0.73 | 1.05 |
| ABCA7        | 10347     | -0.18 | -0.98 | -1.2  | ZNF398   | 57541     | 0.36  | 0.86 | 1.05 |
| PGAP3        | 93210     | -0.14 | -0.98 | -1.2  | PEX19    | 5824      | 0.21  | 0.75 | 1.04 |
| ZNF512B      | 57473     | -0.43 | -0.72 | -1.2  | RGS2     | 5997      | 0.55  | 0.32 | 1.04 |
| S1PR3        | 1903      | 0     | -0.71 | -1.2  | STK3     | 6788      | 0.48  | 0.54 | 1.04 |
| TC2N         | 123036    | -0.01 | -0.59 | -1.2  | NEK7     | 140609    | 0.14  | 0.45 | 1.04 |
| ZCCHC17      | 51538     | -0.27 | -0.83 | -1.2  | SLC36A1  | 206358    | -0.06 | 0.46 | 1.04 |
| LOC388588    | 388588    | 0.24  | -0.52 | -1.2  | ETS1     | 2113      | 0.17  | 0    | 1.04 |
| IRAK1BP1     | 134728    | -0.16 | 0.04  | -1.2  | AKIRIN1  | 79647     | 0.1   | 0.48 | 1.04 |
| CENPBD1      | 92806     | -0.7  | -0.9  | -1.2  | FREQ     | 23413     | 0.47  | 0.75 | 1.04 |
| MATN2        | 4147      | 0.22  | -0.6  | -1.19 | COMMD10  | 51397     | 0.47  | 0.59 | 1.04 |
| GATM         | 2628      | -0.04 | -0.96 | -1.19 | GMEB1    | 10691     | 0.21  | 0.75 | 1.04 |
| NLE1         | 54475     | -0.33 | -0.87 | -1.19 | MAP3K2   | 10746     | 0.41  | 0.66 | 1.04 |
| CEBPA        | 1050      | -0.67 | -0.81 | -1.19 | AMMECR1L | 83607     | 0.31  | 0.59 | 1.04 |
| FGB          | 2244      | -0.17 | -1.18 | -1.19 | C10ORF53 | 282966    | -0.12 | 0.07 | 1.04 |
| STEAP1       | 26872     | -0.35 | -0.68 | -1.19 | C15ORF57 | 90416     | -0.05 | 0.24 | 1.04 |
| MKL2         | 57496     | -0.32 | -0.93 | -1.19 | EGFR     | 1956      | 0.36  | 0.99 | 1.03 |
| C14ORF169    | 79697     | -0.39 | -0.77 | -1.19 | KIAA0247 | 9766      | 0.38  | 0.44 | 1.03 |

|              |           |       |       |       |           |        |       |       |      |
|--------------|-----------|-------|-------|-------|-----------|--------|-------|-------|------|
| CYB5R2       | 51700     | 0.08  | -1    | -1.19 | APOE      | 348    | 0.32  | 0.67  | 1.03 |
| LOC282997    | 282997    | 0.08  | -0.93 | -1.19 | ZNF134    | 7693   | -0.42 | 0.09  | 1.03 |
| C10ORF58     | 84293     | -0.11 | -0.81 | -1.19 | HBP1      | 26959  | 0.43  | 0.52  | 1.03 |
| HAUS1        | 115106    | -0.13 | -0.74 | -1.19 | KLHL25    | 64410  | -0.66 | -0.03 | 1.03 |
| HEATR5A      | 25938     | -0.05 | -0.61 | -1.19 | AKT3      | 10000  | 0.22  | 0.82  | 1.03 |
| LOC728739    | 728739    | -0.27 | -0.45 | -1.19 | LOC144438 | 144438 | 0.45  | 0.57  | 1.03 |
| ZNF618       | 114991    | -0.23 | -0.38 | -1.19 | ADAM6     | 8755   | 0.44  | 0.45  | 1.03 |
| LOC100130711 | 100130711 | 0.26  | -0.16 | -1.19 | ARRDC2    | 27106  | -0.1  | 0.39  | 1.03 |
| TMEM116      | 89894     | -0.05 | -0.35 | -1.19 | NEURL3    | 93082  | -0.04 | 0.03  | 1.03 |
| LOC100129532 | 100129532 | -0.95 | -1.14 | -1.19 | S100A11   | 6282   | 0.2   | 0.78  | 1.02 |
| ALDH3A2      | 224       | -0.33 | -0.55 | -1.18 | SLC16A1   | 6566   | 0.08  | 0.69  | 1.02 |
| TPD52L1      | 7164      | -0.17 | -0.6  | -1.18 | POLR2K    | 5440   | 0.19  | 0.61  | 1.02 |
| C17ORF75     | 64149     | -0.16 | -0.61 | -1.18 | SOX9      | 6662   | 1.04  | 0.89  | 1.02 |
| BDKRB1       | 623       | 0.83  | -0.08 | -1.18 | SBNO2     | 22904  | 0.31  | 0.66  | 1.02 |
| SHMT1        | 6470      | -0.14 | -0.79 | -1.18 | ZNF592    | 9640   | 0.46  | 0.94  | 1.02 |
| BCKDHB       | 594       | 0.06  | -0.78 | -1.18 | ALDH3B2   | 222    | 0.43  | 0.48  | 1.02 |
| BRMS1        | 25855     | -0.32 | -0.38 | -1.18 | FOXN2     | 3344   | 0.48  | 0.63  | 1.02 |
| ASNSD1       | 54529     | -0.36 | -0.81 | -1.18 | DPY19L1   | 23333  | 0.35  | 0.86  | 1.02 |
| TMEM121      | 80757     | -0.28 | -1.02 | -1.18 | RSBN1     | 54665  | 0.5   | 0.57  | 1.02 |
| C11ORF86     | 254439    | 0.23  | 0.34  | -1.18 | GUCA1B    | 2979   | 0.3   | 0.9   | 1.02 |
| C4ORF33      | 132321    | 0.06  | -0.75 | -1.18 | TNKS2     | 80351  | 0.21  | 0.54  | 1.02 |
| INTS3        | 65123     | -0.4  | -1.01 | -1.17 | C6ORF35   | 729515 | -0.16 | 0.44  | 1.02 |
| PDE4B        | 5142      | 0.32  | -0.74 | -1.17 | LOC643371 | 643371 | 0.39  | 0.57  | 1.02 |
| TBC1D9B      | 23061     | -0.45 | -1.01 | -1.17 | MRPL42P5  | 359821 | -0.01 | 0.51  | 1.02 |
| PFKM         | 5213      | -0.17 | -0.69 | -1.17 | ZC3H12C   | 85463  | -0.05 | 0.5   | 1.02 |
| RBL2         | 5934      | -0.23 | -0.73 | -1.17 | ZFYVE1    | 53349  | 0.05  | 0.24  | 1.02 |
| TBCK         | 93627     | -0.31 | -0.76 | -1.17 | ZNF462    | 58499  | -0.77 | -0.1  | 1.02 |
| CPNE4        | 131034    | 0.28  | -0.11 | -1.17 | FBXO22OS  | 692224 | 0.72  | 0.86  | 1.02 |
| LOC647086    | 647086    | 0.08  | -0.38 | -1.17 | LOC400027 | 400027 | 0.57  | 0.84  | 1.02 |
| SLITRK6      | 84189     | 0.46  | -0.09 | -1.17 | MET       | 4233   | -0.08 | 0.48  | 1.01 |
| FAM69B       | 138311    | -0.05 | -0.29 | -1.17 | ATG12     | 9140   | 0.11  | 0.5   | 1.01 |

|              |           |       |       |       |              |           |       |       |      |
|--------------|-----------|-------|-------|-------|--------------|-----------|-------|-------|------|
| ZFP14        | 57677     | -0.23 | -0.09 | -1.17 | NMT2         | 9397      | -0.28 | -0.06 | 1.01 |
| DHFR         | 1719      | -0.11 | -1.11 | -1.16 | STK17B       | 9262      | 0.63  | 0.51  | 1.01 |
| TTC37        | 9652      | -0.05 | -0.36 | -1.16 | MMP25        | 64386     | 0.36  | 0.35  | 1.01 |
| FAM189B      | 10712     | 0.06  | -0.34 | -1.16 | PTRF         | 284119    | -0.1  | 0.23  | 1.01 |
| NDST2        | 8509      | 0.09  | -0.34 | -1.16 | PTTG2        | 10744     | 0.57  | 0.6   | 1.01 |
| PTPN13       | 5783      | -0.41 | -0.69 | -1.16 | B3GNT2       | 10678     | 0.32  | 0.58  | 1.01 |
| EPB49        | 2039      | -0.04 | -0.64 | -1.16 | C13ORF37     | 440145    | 0.49  | 0.7   | 1.01 |
| PSIP1        | 11168     | -0.34 | -0.84 | -1.16 | FLJ16734     | 641928    | 0.4   | 0.67  | 1.01 |
| APEX1        | 328       | -0.06 | -0.58 | -1.16 | LOC100286937 | 100286937 | 0.18  | 0.55  | 1.01 |
| TNFRSF21     | 27242     | -0.34 | -0.96 | -1.16 | C6ORF150     | 115004    | 0.59  | 0.54  | 1.01 |
| MRS2         | 57380     | -0.38 | -0.66 | -1.16 | LOC100128950 | 100128950 | 0.75  | 0.75  | 1.01 |
| SLC27A5      | 10998     | 0.34  | -0.78 | -1.16 | SLC39A7      | 7922      | 0.38  | 0.57  | 1    |
| TBC1D16      | 125058    | -0.03 | -0.49 | -1.16 | RNF24        | 11237     | 0.19  | 0.48  | 1    |
| GLI4         | 2738      | -0.24 | -0.56 | -1.16 | ALG13        | 79868     | 0.14  | 0.72  | 1    |
| ATOH8        | 84913     | -0.4  | -0.22 | -1.16 | GRIN2D       | 2906      | 0.86  | 0.78  | 1    |
| LRFN1        | 57622     | -0.06 | -0.37 | -1.16 | POU5F1       | 5460      | 0.43  | 0.77  | 1    |
| LOC151162    | 151162    | 0.12  | -0.24 | -1.16 | CLIC1        | 1192      | -0.05 | 0.47  | 1    |
| VPS26B       | 112936    | 0.08  | -0.49 | -1.16 | TMEM87A      | 25963     | 0.12  | 0.58  | 1    |
| ADPRHL1      | 113622    | 0.15  | -0.84 | -1.16 | MAPKSP1      | 8649      | 0.11  | 0.45  | 1    |
| KIF26A       | 26153     | -0.08 | -0.87 | -1.16 | RNF111       | 54778     | 0.32  | 0.67  | 1    |
| CYP4X1       | 260293    | -1.04 | -0.81 | -1.16 | SLC24A3      | 57419     | 0.22  | 0.19  | 1    |
| WDR31        | 114987    | -0.65 | -0.69 | -1.16 | MYLIP        | 29116     | 0.4   | 0.88  | 1    |
| LOC100147773 | 100147773 | -0.96 | -1.04 | -1.16 | UBE2R2       | 54926     | 0.43  | 0.75  | 1    |
| UBXN1        | 51035     | -0.17 | -0.78 | -1.15 |              |           |       |       |      |
| CD44         | 960       | 0.07  | -0.58 | -1.15 |              |           |       |       |      |
| ADCY3        | 109       | -0.05 | -0.63 | -1.15 |              |           |       |       |      |
| CACNB3       | 784       | -0.06 | -0.92 | -1.15 |              |           |       |       |      |
| THAP7        | 80764     | -0.2  | -0.42 | -1.15 |              |           |       |       |      |
| DAK          | 26007     | 0.12  | -0.56 | -1.15 |              |           |       |       |      |
| ASCC1        | 51008     | -0.06 | -0.15 | -1.15 |              |           |       |       |      |
| ANKRD36B     | 57730     | -0.43 | -0.43 | -1.15 |              |           |       |       |      |

|              |           |       |       |       |
|--------------|-----------|-------|-------|-------|
| AXIN2        | 8313      | -0.41 | -0.93 | -1.15 |
| MND1         | 84057     | 0.1   | -0.6  | -1.15 |
| ST6GAL2      | 84620     | -0.08 | -0.43 | -1.15 |
| ZBTB45       | 84878     | -0.18 | -0.47 | -1.15 |
| PABPC4L      | 132430    | -0.64 | -0.62 | -1.15 |
| DAB2         | 1601      | -0.8  | -0.88 | -1.14 |
| EFNB1        | 1947      | -0.2  | -0.68 | -1.14 |
| SKP2         | 6502      | 0.26  | -0.42 | -1.14 |
| PRKX         | 5613      | -0.26 | -0.5  | -1.14 |
| NAP1L1       | 4673      | -0.02 | -0.49 | -1.14 |
| SLC22A18     | 5002      | 0.05  | -0.47 | -1.14 |
| PLCD1        | 5333      | 0.17  | -0.76 | -1.14 |
| PRKCQ        | 5588      | -0.56 | -0.93 | -1.14 |
| BDH1         | 622       | -0.08 | -0.78 | -1.14 |
| TMCC1        | 23023     | -0.52 | -0.96 | -1.14 |
| TEX264       | 51368     | 0.02  | -0.16 | -1.14 |
| KDELC1       | 79070     | 0.02  | -0.81 | -1.14 |
| C2ORF74      | 339804    | -0.48 | -0.64 | -1.14 |
| DTD1         | 92675     | 0.01  | -0.52 | -1.14 |
| LOC91948     | 91948     | 0.03  | -0.63 | -1.14 |
| POLR3H       | 171568    | -0.55 | -0.82 | -1.14 |
| LOC653113    | 653113    | -0.49 | -0.58 | -1.14 |
| PLCXD3       | 345557    | 0.23  | -0.41 | -1.14 |
| RCCD1        | 91433     | -0.14 | -0.1  | -1.14 |
| LOC100008588 | 100008588 | 0.34  | -0.76 | -1.14 |
| PDK3         | 5165      | -0.2  | -0.73 | -1.13 |
| METTL13      | 51603     | -0.37 | -0.57 | -1.13 |
| MPP2         | 4355      | -0.44 | -1.05 | -1.13 |
| PAPSS1       | 9061      | -0.15 | -0.85 | -1.13 |
| TGFB1I1      | 7041      | -0.15 | -0.67 | -1.13 |
| FAM192A      | 80011     | -0.28 | -0.84 | -1.13 |

|              |        |       |       |       |
|--------------|--------|-------|-------|-------|
| MYO19        | 80179  | 0.05  | -0.36 | -1.13 |
| LOC153684    | 153684 | -0.5  | -0.77 | -1.13 |
| MIF4GD       | 57409  | -0.08 | -0.55 | -1.13 |
| C1ORF220     | 400798 | -0.42 | -0.52 | -1.13 |
| SH3PXD2B     | 285590 | -0.12 | -0.34 | -1.13 |
| C6ORF154     | 221424 | 0.24  | -0.34 | -1.13 |
| CACNG6       | 59285  | 0.21  | -0.09 | -1.13 |
| DKFZP434H168 | 26077  | 0.11  | -0.87 | -1.13 |
| C1ORF211     | 148645 | -0.82 | -0.98 | -1.13 |
| HNRNPD       | 3184   | -0.23 | -0.88 | -1.12 |
| WFS1         | 7466   | 0.24  | -0.3  | -1.12 |
| ACD          | 65057  | -0.51 | -0.86 | -1.12 |
| F2RL2        | 2151   | -0.28 | -0.7  | -1.12 |
| OSGEP        | 55644  | -0.11 | -0.88 | -1.12 |
| MAB21L2      | 10586  | 0.42  | 0     | -1.12 |
| NIPA2        | 81614  | -0.66 | -0.87 | -1.12 |
| ALDH1A1      | 216    | -0.07 | -0.77 | -1.12 |
| GGCT         | 79017  | -0.05 | -0.59 | -1.12 |
| CCDC90B      | 60492  | -0.17 | -0.5  | -1.12 |
| ACN9         | 57001  | 0.26  | 0.02  | -1.12 |
| MYBBP1A      | 10514  | -0.23 | -0.69 | -1.12 |
| ZNF232       | 7775   | -0.58 | -0.55 | -1.12 |
| CEP63        | 80254  | -0.04 | -0.76 | -1.12 |
| MAVS         | 57506  | -0.02 | -0.07 | -1.12 |
| C17ORF72     | 92340  | -0.5  | -1.07 | -1.12 |
| CCDC77       | 84318  | -0.1  | -0.78 | -1.12 |
| CPSF3        | 51692  | -0.42 | -0.92 | -1.12 |
| LOC729088    | 729088 | -0.27 | -0.4  | -1.12 |
| CCDC104      | 112942 | 0.12  | -0.62 | -1.12 |
| VSTM2L       | 128434 | 0     | -0.74 | -1.12 |
| KIAA0317     | 9870   | -0.13 | -0.76 | -1.11 |

|              |           |       |       |       |
|--------------|-----------|-------|-------|-------|
| SLC37A4      | 2542      | 0.15  | -0.24 | -1.11 |
| CORO2A       | 7464      | 0.49  | 0.02  | -1.11 |
| FXN          | 2395      | -0.17 | -0.53 | -1.11 |
| LRRC23       | 10233     | -0.31 | -0.71 | -1.11 |
| SLC16A5      | 9121      | -0.13 | 0.04  | -1.11 |
| PLA2G16      | 11145     | -0.16 | -0.62 | -1.11 |
| N6AMT1       | 29104     | -0.41 | -0.65 | -1.11 |
| MLST8        | 64223     | -0.22 | -0.36 | -1.11 |
| C6ORF120     | 387263    | -0.08 | -0.2  | -1.11 |
| LOC100128108 | 100128108 | -0.56 | -0.77 | -1.11 |
| TCHP         | 84260     | -0.63 | -0.68 | -1.11 |
| BOK          | 666       | -0.79 | -1.06 | -1.11 |
| USO1         | 8615      | -0.06 | -0.53 | -1.1  |
| HIRIP3       | 8479      | -0.03 | -0.36 | -1.1  |
| DLG3         | 1741      | -0.03 | -0.12 | -1.1  |
| PDLIM1       | 9124      | 0.09  | -0.75 | -1.1  |
| C18ORF10     | 25941     | 0.06  | -0.84 | -1.1  |
| C21ORF59     | 56683     | -0.19 | -0.49 | -1.1  |
| RNASEH1      | 246243    | -0.57 | -0.94 | -1.1  |
| SDPR         | 8436      | -0.33 | -0.13 | -1.1  |
| ELL3         | 80237     | -0.55 | -1.05 | -1.1  |
| PLK1S1       | 55857     | -0.75 | -0.7  | -1.1  |
| UBE2Q2       | 92912     | -0.38 | -0.74 | -1.1  |
| LOC100290344 | 100290344 | 0.23  | -0.1  | -1.1  |
| NUDT22       | 84304     | -0.11 | -0.23 | -1.1  |
| SLC5A11      | 115584    | 0.06  | -1.02 | -1.1  |
| KIAA1908     | 114796    | -0.8  | -0.97 | -1.1  |
| KLK9         | 284366    | -0.92 | -0.79 | -1.1  |
| SLCO2B1      | 11309     | 0.03  | -0.99 | -1.09 |
| MID1         | 4281      | -0.35 | -0.73 | -1.09 |
| APEX2        | 27301     | -0.36 | -0.91 | -1.09 |

|              |           |       |       |       |
|--------------|-----------|-------|-------|-------|
| PDE8A        | 5151      | -0.56 | -0.95 | -1.09 |
| LOC100289097 | 100289097 | -0.13 | -0.59 | -1.09 |
| HEATR3       | 55027     | -0.4  | -0.72 | -1.09 |
| C22ORF40     | 150383    | -0.36 | -0.58 | -1.09 |
| FUK          | 197258    | 0.03  | -0.5  | -1.09 |
| RABL2A       | 11159     | -0.45 | -0.64 | -1.09 |
| MAF1         | 84232     | -0.11 | -0.37 | -1.09 |
| TSEN54       | 283989    | 0.32  | -0.05 | -1.09 |
| TMEM129      | 92305     | 0.19  | -0.01 | -1.09 |
| PLAT         | 5327      | -0.05 | -0.86 | -1.08 |
| SYNE2        | 23224     | -0.43 | -0.97 | -1.08 |
| TBL1Y        | 90665     | -0.34 | -0.23 | -1.08 |
| ZNF395       | 55893     | -0.41 | -0.67 | -1.08 |
| SCARA3       | 51435     | 0.07  | -0.66 | -1.08 |
| MANSC1       | 54682     | 0.05  | -0.39 | -1.08 |
| RNFT2        | 84900     | -0.12 | -0.49 | -1.08 |
| AFAP1L2      | 84632     | -0.47 | -0.85 | -1.08 |
| C8ORF47      | 203111    | -0.37 | -0.82 | -1.08 |
| TSHZ1        | 10194     | 0.1   | -0.4  | -1.08 |
| WDR24        | 84219     | -0.04 | 0.04  | -1.08 |
| TMEM141      | 85014     | -0.03 | -1.02 | -1.08 |
| USP40        | 55230     | -0.53 | -0.65 | -1.08 |
| ZNF19        | 7567      | -0.62 | -0.76 | -1.08 |
| SNX17        | 9784      | -0.16 | -0.45 | -1.07 |
| MMP15        | 4324      | 0.38  | -0.16 | -1.07 |
| TTC3         | 7267      | -0.15 | -0.77 | -1.07 |
| ABCC5        | 10057     | 0.24  | -0.3  | -1.07 |
| MBD4         | 8930      | -0.41 | -0.8  | -1.07 |
| DCLRE1A      | 9937      | -0.81 | -0.98 | -1.07 |
| NBEAL2       | 23218     | -0.18 | -0.21 | -1.07 |
| ZNF248       | 57209     | -0.45 | -0.58 | -1.07 |

|              |           |       |       |       |
|--------------|-----------|-------|-------|-------|
| FAM179B      | 23116     | -0.49 | -1.01 | -1.07 |
| PLCH1        | 23007     | -0.33 | -0.7  | -1.07 |
| DSCC1        | 79075     | -0.19 | -0.65 | -1.07 |
| C20ORF27     | 54976     | 0.03  | -0.37 | -1.07 |
| TMC5         | 79838     | -0.04 | -0.65 | -1.07 |
| ACOXL        | 55289     | 0.02  | -0.46 | -1.07 |
| PAOX         | 196743    | -0.31 | -0.69 | -1.07 |
| C14ORF72     | 145200    | -0.13 | -0.49 | -1.07 |
| HEJ1         | 94236     | -0.5  | -1.06 | -1.07 |
| DPRXP4       | 503645    | 0.24  | -0.04 | -1.07 |
| CCDC122      | 160857    | -0.51 | -0.59 | -1.07 |
| LOC100133915 | 100133915 | -1.29 | -1.01 | -1.07 |
| HADH         | 3033      | 0.1   | -0.55 | -1.06 |
| AKR1A1       | 10327     | 0.04  | -0.02 | -1.06 |
| RFC5         | 5985      | -0.36 | -1    | -1.06 |
| HOXC6        | 3223      | -0.34 | -0.84 | -1.06 |
| RAD51L3      | 5892      | -0.35 | -0.82 | -1.06 |
| TENC1        | 23371     | -0.3  | -0.72 | -1.06 |
| MEGF9        | 1955      | -0.05 | -0.63 | -1.06 |
| MAN1A2       | 10905     | -0.21 | -0.46 | -1.06 |
| AAAS         | 8086      | 0.23  | -0.54 | -1.06 |
| LGR4         | 55366     | 0.05  | 0.22  | -1.06 |
| MYO5C        | 55930     | -0.24 | -0.8  | -1.06 |
| C14ORF101    | 54916     | -0.28 | -0.65 | -1.06 |
| ESYT2        | 57488     | -0.01 | -0.56 | -1.06 |
| SLC29A4      | 222962    | -0.58 | -0.9  | -1.06 |
| TIGD5        | 84948     | -0.45 | -0.62 | -1.06 |
| C12ORF69     | 440087    | -0.51 | -0.26 | -1.06 |
| LOC143286    | 143286    | -0.15 | -0.38 | -1.06 |
| LOC339803    | 339803    | -0.33 | -0.11 | -1.06 |
| KRTAP19-8    | 728299    | 0.12  | -0.56 | -1.06 |



|              |           |       |       |       |
|--------------|-----------|-------|-------|-------|
| LOC401022    | 401022    | -0.11 | -0.82 | -1.06 |
| NCRNA00107   | 283981    | -0.62 | -0.52 | -1.06 |
| ARPC1B       | 10095     | -0.09 | -0.3  | -1.05 |
| PRPSAP1      | 5635      | -0.35 | -0.56 | -1.05 |
| IFIT1        | 3434      | -0.7  | -0.84 | -1.05 |
| C16ORF62     | 57020     | -0.03 | -0.67 | -1.05 |
| HMGB3        | 3149      | -0.04 | -0.89 | -1.05 |
| PALM         | 5064      | -0.05 | -0.91 | -1.05 |
| MAP2K5       | 5607      | 0.15  | -0.1  | -1.05 |
| NR2F6        | 2063      | 0.03  | -0.58 | -1.05 |
| CBX5         | 23468     | -0.36 | -0.76 | -1.05 |
| BTN3A2       | 11118     | 0.03  | -0.39 | -1.05 |
| PRICKLE2     | 166336    | -0.57 | -0.85 | -1.05 |
| STEAP2       | 261729    | -0.26 | -0.7  | -1.05 |
| F8A2         | 474383    | -0.08 | -0.32 | -1.05 |
| PAR-SN       | 347746    | -0.3  | -0.48 | -1.05 |
| LOC100270746 | 100270746 | 0.47  | 0.02  | -1.05 |
| SUMF1        | 285362    | 0.06  | -0.93 | -1.05 |
| UFSP1        | 402682    | -0.59 | -0.88 | -1.05 |
| WDR81        | 124997    | -0.61 | -0.51 | -1.05 |
| TMED6        | 146456    | -1.05 | -0.93 | -1.05 |
| ADSL         | 158       | -0.29 | -0.67 | -1.04 |
| C21ORF33     | 8209      | -0.11 | -0.37 | -1.04 |
| NAE1         | 8883      | -0.51 | -0.87 | -1.04 |
| SCO2         | 9997      | -0.22 | -0.6  | -1.04 |
| ADD2         | 119       | -0.02 | -0.37 | -1.04 |
| SP110        | 3431      | -0.59 | -0.78 | -1.04 |
| HSPA5        | 3309      | -0.51 | -0.73 | -1.04 |
| PEG10        | 23089     | 0.26  | -0.8  | -1.04 |
| TNNT1        | 7138      | -0.11 | -0.72 | -1.04 |
| C11ORF2      | 738       | 0.12  | -0.27 | -1.04 |

|           |        |       |       |       |
|-----------|--------|-------|-------|-------|
| RSRC1     | 51319  | -0.16 | -0.79 | -1.04 |
| NLRX1     | 79671  | -0.46 | -0.55 | -1.04 |
| SLC2A6    | 11182  | -0.36 | -0.89 | -1.04 |
| C5ORF54   | 63920  | -0.51 | -0.66 | -1.04 |
| FARSB     | 10056  | -0.32 | -0.63 | -1.04 |
| SPATA17   | 128153 | -0.21 | -0.73 | -1.04 |
| C1ORF131  | 128061 | -0.49 | -0.42 | -1.04 |
| GATS      | 352954 | -0.38 | -0.46 | -1.04 |
| TERC      | 7012   | -0.27 | -0.48 | -1.04 |
| DIRC1     | 116093 | 0.24  | -0.06 | -1.04 |
| EEF2      | 1938   | -0.1  | -0.35 | -1.03 |
| RRBP1     | 6238   | -0.14 | -0.48 | -1.03 |
| PHB2      | 11331  | -0.06 | -0.54 | -1.03 |
| PYGL      | 5836   | 0.03  | -0.56 | -1.03 |
| LTK       | 4058   | -0.41 | -0.35 | -1.03 |
| ZNF189    | 7743   | -0.89 | -0.96 | -1.03 |
| POLR2I    | 5438   | -0.26 | -0.63 | -1.03 |
| NTAN1     | 123803 | -0.06 | -0.38 | -1.03 |
| TRIM66    | 9866   | -0.32 | -0.54 | -1.03 |
| CDK5RAP3  | 80279  | -0.24 | -0.7  | -1.03 |
| ANKRD30A  | 91074  | -0.33 | -0.62 | -1.03 |
| FLJ40504  | 284085 | -0.4  | -0.69 | -1.03 |
| LOC442249 | 442249 | -0.37 | -0.7  | -1.03 |
| C5ORF24   | 134553 | -0.26 | -0.37 | -1.03 |
| CAMK2N2   | 94032  | -0.05 | -0.9  | -1.03 |
| ZNF70     | 7621   | -0.64 | -0.78 | -1.03 |
| SEPHS2    | 22928  | -0.12 | -0.58 | -1.02 |
| DARS      | 1615   | -0.43 | -0.78 | -1.02 |
| CTSL1     | 1514   | 0     | -0.18 | -1.02 |
| U2AF1     | 7307   | -0.29 | -1    | -1.02 |
| ICAM3     | 3385   | 0.18  | 0     | -1.02 |

|              |           |       |       |       |
|--------------|-----------|-------|-------|-------|
| PHTF1        | 10745     | -0.42 | -0.88 | -1.02 |
| WDR18        | 57418     | -0.24 | -0.45 | -1.02 |
| NIPAL3       | 57185     | -0.11 | -0.37 | -1.02 |
| KLRG1        | 10219     | -0.27 | -0.6  | -1.02 |
| CCDC51       | 79714     | -0.28 | -0.42 | -1.02 |
| FAM176B      | 55194     | -0.77 | -0.72 | -1.02 |
| BATF3        | 55509     | -0.32 | -1.01 | -1.02 |
| AGTRAP       | 57085     | -0.14 | -0.67 | -1.02 |
| ARRDC1       | 92714     | -0.18 | -0.56 | -1.02 |
| LOC100130264 | 100130264 | -0.34 | -0.91 | -1.02 |
| DHFRL1       | 200895    | -0.48 | -0.38 | -1.02 |
| LOC440104    | 440104    | -0.59 | -0.85 | -1.02 |
| MTERFD3      | 80298     | -0.7  | -0.78 | -1.02 |
| KIF3C        | 3797      | 0.04  | -0.42 | -1.01 |
| PRKAR2B      | 5577      | 0.2   | -0.72 | -1.01 |
| CDC7         | 8317      | -0.07 | -0.5  | -1.01 |
| LGALS2       | 3957      | -0.2  | -0.99 | -1.01 |
| ALDH7A1      | 501       | -0.02 | -0.92 | -1.01 |
| KIAA0146     | 23514     | -0.2  | -0.81 | -1.01 |
| PON3         | 5446      | -0.29 | -0.94 | -1.01 |
| PGAP2        | 27315     | 0.2   | -0.59 | -1.01 |
| NLK          | 51701     | -0.14 | -0.74 | -1.01 |
| ARMC7        | 79637     | 0.06  | -0.28 | -1.01 |
| TFB1M        | 51106     | -0.24 | -0.14 | -1.01 |
| MRPL17       | 63875     | -0.08 | -0.37 | -1.01 |
| LOC100128077 | 100128077 | -0.49 | -0.66 | -1.01 |
| LOC100129791 | 100129791 | -0.42 | -0.76 | -1.01 |
| LOC100130506 | 100130506 | 0.06  | -0.51 | -1.01 |
| OR52B6       | 340980    | -0.32 | -0.6  | -1.01 |
| OR5L2        | 26338     | 0.05  | -0.46 | -1.01 |
| WBSCR27      | 155368    | -0.2  | -0.69 | -1.01 |

|           |        |       |       |       |
|-----------|--------|-------|-------|-------|
| ZNF581    | 51545  | -0.28 | -0.52 | -1.01 |
| BTBD8     | 284697 | -0.33 | -0.38 | -1.01 |
| LOC653391 | 653391 | -0.51 | -0.39 | -1.01 |
| PPAPDC2   | 403313 | -0.16 | -0.34 | -1.01 |
| STK33     | 65975  | -0.33 | -0.34 | -1.01 |
| PGM2      | 55276  | -0.14 | -0.93 | -1.01 |
| FNTB      | 2342   | -0.38 | -0.9  | -1    |
| ANXA8L2   | 244    | -0.25 | -0.5  | -1    |
| WDR61     | 80349  | -0.1  | -0.71 | -1    |
| BRCC3     | 79184  | -0.67 | -0.98 | -1    |
| FZD4      | 8322   | 0.01  | -0.28 | -1    |
| USP18     | 11274  | -0.05 | -0.26 | -1    |
| FDPSL2A   | 619190 | -0.17 | -0.77 | -1    |

---
