# Supplementary material for: Helveticoside is a biologically active component of the seed extract of Descurainia sophia and induces reciprocal gene regulation in A549 human lung cancer cells
Source: PubMed Central journal article supplement (PMC4575430; doi:10.1186/s12864-015-1918-1), 2015-09-18
Supplement: 12864_2015_1918_MOESM3_ESM.pdf [file 12864_2015_1918_MOESM3_ESM.pdf]

**Additional file 3. Top 15 chemicals with high connectivity scores in the analysis of EEDS.**

| Rank <sup>1</sup> | Name <sup>2</sup>         | Mean score <sup>3</sup> | N <sup>4</sup> | Enrichment <sup>5</sup> | p-value <sup>6</sup> | Specificity <sup>7</sup> | % non-null <sup>8</sup> |
|-------------------|---------------------------|-------------------------|----------------|-------------------------|----------------------|--------------------------|-------------------------|
| 1                 | Helveticoside             | 0.839                   | 6              | 0.995                   | 0                    | 0                        | 100                     |
| 2                 | Lanatoside C              | 0.850                   | 6              | 0.995                   | 0                    | 0                        | 100                     |
| 3                 | Anisomycin                | 0.764                   | 4              | 0.994                   | 0                    | 0.0155                   | 100                     |
| 4                 | Digoxigenin               | 0.765                   | 5              | 0.993                   | 0                    | 0                        | 100                     |
| 5                 | Digoxin                   | 0.753                   | 4              | 0.993                   | 0                    | 0                        | 100                     |
| 6                 | Digitoxigenin             | 0.726                   | 4              | 0.991                   | 0                    | 0                        | 100                     |
| 7                 | Ouabain                   | 0.737                   | 4              | 0.989                   | 0                    | 0                        | 100                     |
| 8                 | Phenoxybenzamine          | 0.532                   | 4              | 0.983                   | 0                    | 0.0594                   | 100                     |
| 9                 | Cicloheximide             | 0.568                   | 4              | 0.975                   | 0                    | 0.0113                   | 100                     |
| 10                | Puromycin                 | 0.504                   | 4              | 0.97                    | 0                    | 0.0337                   | 100                     |
| 11                | Withaferin A              | 0.402                   | 4              | 0.959                   | 0                    | 0.0316                   | 100                     |
| 12                | Niclosamide               | 0.411                   | 5              | 0.938                   | 0                    | 0.0052                   | 100                     |
| 13                | Pyrvinium                 | 0.428                   | 6              | 0.907                   | 0                    | 0.0093                   | 100                     |
| 14                | Thioridazine              | 0.360                   | 20             | 0.708                   | 0                    | 0.0274                   | 95                      |
| 15                | 15-delta prostaglandin J2 | 0.317                   | 15             | 0.679                   | 0                    | 0.0447                   | 86                      |

<sup>1</sup>Rank is based upon estimates of the likelihood that the enrichment of a set of instances in the ordered list of all instances for that result would be observed by chance.

<sup>2</sup>Name given to a perturbagen.

<sup>3</sup>The arithmetic mean of the connectivity scores for those instances.

<sup>4</sup>The number of those instances.

<sup>5</sup>A measure of the enrichment of those instances in the order list of all instances.

<sup>6</sup>A permutation p-value for that enrichment score.

<sup>7</sup>The specificity of that enrichment.

<sup>8</sup>The non-null percentage.
