# Supplementary material for: Helveticoside is a biologically active component of the seed extract of Descurainia sophia and induces reciprocal gene regulation in A549 human lung cancer cells
Source: PubMed Central journal article supplement (PMC4575430; doi:10.1186/s12864-015-1918-1), 2015-09-18
Supplement: 12864_2015_1918_MOESM4_ESM.pdf [file 12864_2015_1918_MOESM4_ESM.pdf]

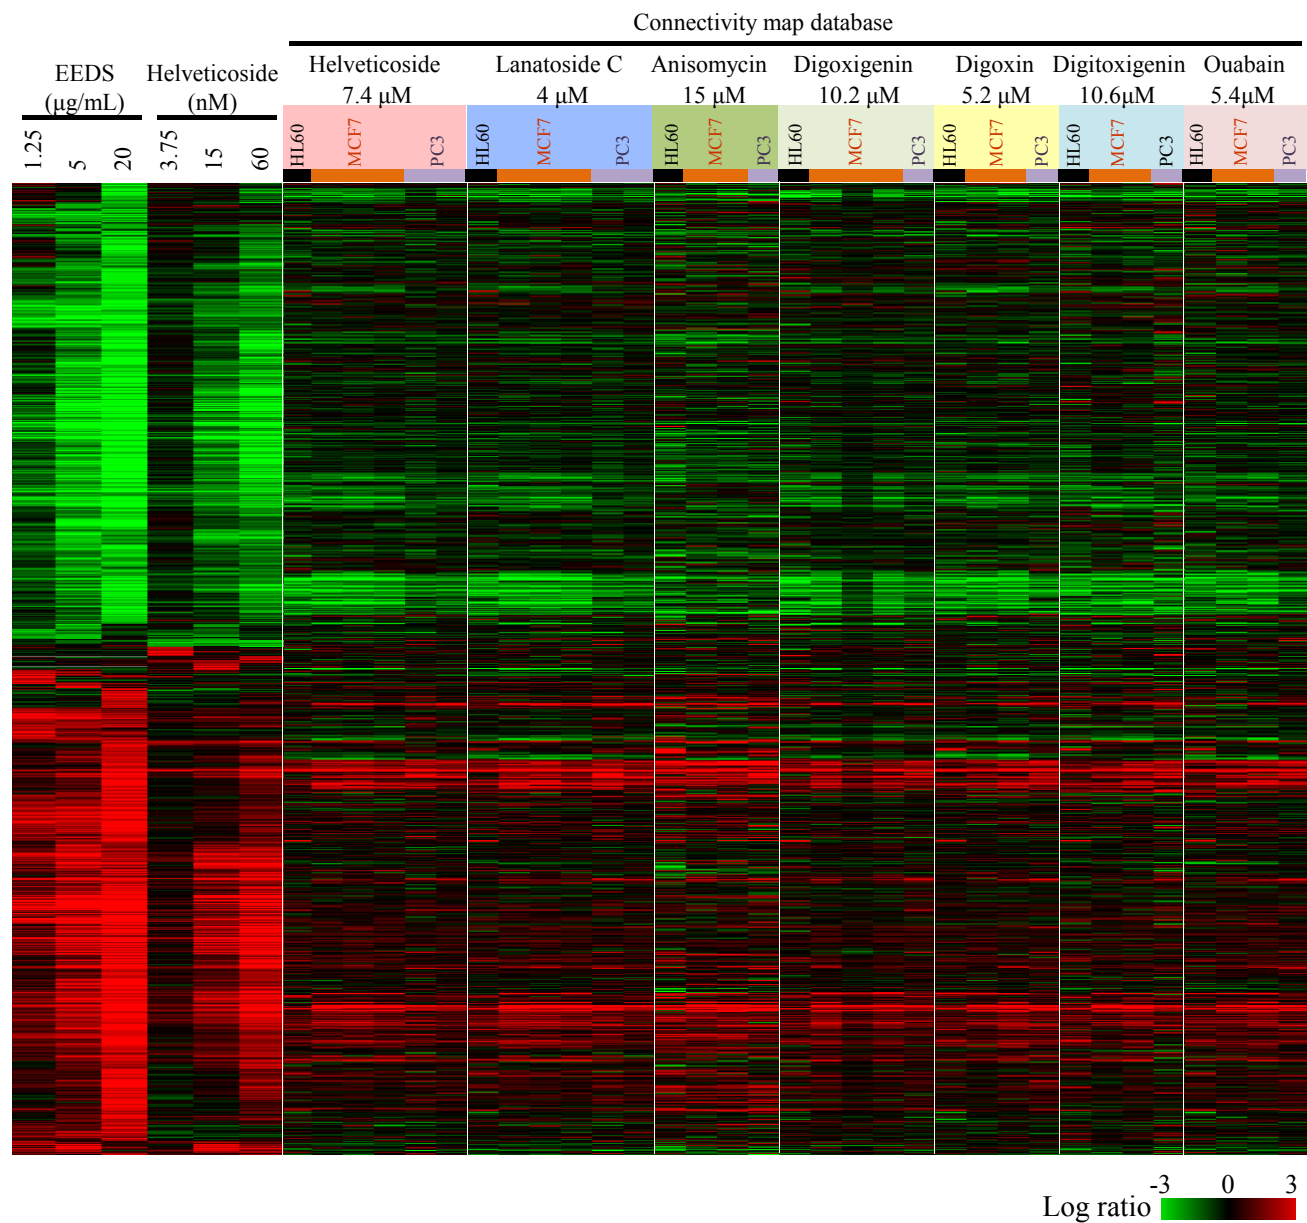

**Additional file 4. Comparison of gene expression profiles.** The gene expression profiles obtained with our EEDS and helveticoside experiments and for the seven top-ranked drugs selected from the connectivity map database were compared. For the seven top-ranked drugs, the cell line and drug concentration used in the experiment are indicated with different colors.
