# Supplementary material for: Helveticoside is a biologically active component of the seed extract of Descurainia sophia and induces reciprocal gene regulation in A549 human lung cancer cells
Source: PubMed Central journal article supplement (PMC4575430; doi:10.1186/s12864-015-1918-1), 2015-09-18
Supplement: 12864_2015_1918_MOESM6_ESM.pdf [file 12864_2015_1918_MOESM6_ESM.pdf]

**Additional file 6. GO terms enriched (FDR<0.01) by helveticoside.**

| <b>Pattern</b>         | <b>GO ID</b> | <b>Name</b>                                                                                  | <b>p-value<sup>1</sup></b> | <b>FDR<sup>2</sup></b> |
|------------------------|--------------|----------------------------------------------------------------------------------------------|----------------------------|------------------------|
| Down-regulated pattern | GO:0055114   | Oxidation reduction                                                                          | 4.49E-08                   | 1.13E-04               |
| Up-regulated pattern   | GO:0042981   | Regulation of apoptosis                                                                      | 9.16E-09                   | 2.56E-05               |
|                        | GO:0019220   | Regulation of phosphate metabolic process                                                    | 1.29E-08                   | 1.79E-05               |
|                        | GO:0051174   | Regulation of phosphorus metabolic process                                                   | 1.29E-08                   | 1.79E-05               |
|                        | GO:0043067   | Regulation of programmed cell death                                                          | 1.41E-08                   | 1.31E-05               |
|                        | GO:0010941   | Regulation of cell death                                                                     | 1.61E-08                   | 1.12E-05               |
|                        | GO:0006357   | Regulation of transcription from RNA polymerase II promoter                                  | 5.87E-08                   | 3.28E-05               |
|                        | GO:0042325   | Regulation of phosphorylation                                                                | 7.44E-08                   | 3.46E-05               |
|                        | GO:0007167   | Enzyme linked receptor protein signaling pathway                                             | 1.32E-07                   | 5.26E-05               |
|                        | GO:0042127   | Regulation of cell proliferation                                                             | 2.59E-07                   | 9.04E-05               |
|                        | GO:0007242   | Intracellular signaling cascade                                                              | 7.04E-07                   | 2.18E-04               |
|                        | GO:0045449   | Regulation of transcription                                                                  | 7.22E-07                   | 2.01E-04               |
|                        | GO:0051173   | Positive regulation of nitrogen compound metabolic process                                   | 1.37E-06                   | 3.48E-04               |
|                        | GO:0009891   | Positive regulation of biosynthetic process                                                  | 1.48E-06                   | 3.45E-04               |
|                        | GO:0009890   | Negative regulation of biosynthetic process                                                  | 2.52E-06                   | 5.41E-04               |
|                        | GO:0031327   | Negative regulation of cellular biosynthetic process                                         | 3.08E-06                   | 6.13E-04               |
|                        | GO:0001568   | Blood vessel development                                                                     | 3.22E-06                   | 5.99E-04               |
|                        | GO:0016265   | Cell death                                                                                   | 4.14E-06                   | 7.21E-04               |
|                        | GO:0031328   | Positive regulation of cellular biosynthetic process                                         | 4.27E-06                   | 7.02E-04               |
|                        | GO:0012501   | Programmed cell death                                                                        | 5.11E-06                   | 7.92E-04               |
|                        | GO:0006350   | Transcription                                                                                | 5.14E-06                   | 7.55E-04               |
|                        | GO:0001944   | Vasculature development                                                                      | 5.18E-06                   | 7.22E-04               |
|                        | GO:0043066   | Negative regulation of apoptosis                                                             | 5.43E-06                   | 7.22E-04               |
|                        | GO:0045935   | Positive regulation of nucleobase, nucleoside, nucleotide and nucleic acid metabolic process | 5.61E-06                   | 7.11E-04               |
|                        | GO:0008219   | Cell death                                                                                   | 6.85E-06                   | 8.31E-04               |
|                        | GO:0043069   | Negative regulation of programmed cell death                                                 | 7.43E-06                   | 8.64E-04               |
|                        | GO:0051338   | Regulation of transferase activity                                                           | 7.44E-06                   | 8.30E-04               |
|                        | GO:0060548   | Negative regulation of cell death                                                            | 7.89E-06                   | 8.47E-04               |
|                        | GO:0045859   | Regulation of protein kinase activity                                                        | 8.96E-06                   | 9.26E-04               |
|                        | GO:0010557   | Positive regulation of macromolecule biosynthetic process                                    | 9.83E-06                   | 9.79E-04               |

|            |                                                                                              |          |          |
|------------|----------------------------------------------------------------------------------------------|----------|----------|
| GO:0010558 | Negative regulation of macromolecule biosynthetic process                                    | 1.65E-05 | 1.58E-03 |
| GO:0048514 | Blood vessel morphogenesis                                                                   | 1.73E-05 | 1.61E-03 |
| GO:0043549 | Regulation of kinase activity                                                                | 1.85E-05 | 1.66E-03 |
| GO:0051252 | Regulation of RNA metabolic process                                                          | 2.85E-05 | 2.48E-03 |
| GO:0010604 | Positive regulation of macromolecule metabolic process                                       | 3.22E-05 | 2.71E-03 |
| GO:0045934 | Negative regulation of nucleobase, nucleoside, nucleotide and nucleic acid metabolic process | 3.23E-05 | 2.64E-03 |
| GO:0006915 | Apoptosis                                                                                    | 3.27E-05 | 2.60E-03 |
| GO:0007243 | Protein kinase cascade                                                                       | 3.65E-05 | 2.82E-03 |
| GO:0051172 | Negative regulation of nitrogen compound metabolic process                                   | 4.46E-05 | 3.35E-03 |
| GO:0007169 | Transmembrane receptor protein tyrosine kinase signaling pathway                             | 4.99E-05 | 3.66E-03 |
| GO:0008285 | Negative regulation of cell proliferation                                                    | 5.56E-05 | 3.97E-03 |
| GO:0016481 | Negative regulation of transcription                                                         | 5.85E-05 | 4.07E-03 |
| GO:0051254 | Positive regulation of RNA metabolic process                                                 | 6.88E-05 | 4.67E-03 |
| GO:0043065 | Positive regulation of apoptosis                                                             | 6.91E-05 | 4.58E-03 |
| GO:0006355 | Regulation of transcription, DNA-dependent                                                   | 7.28E-05 | 4.71E-03 |
| GO:0043068 | Positive regulation of programmed cell death                                                 | 8.02E-05 | 5.07E-03 |
| GO:0010942 | Positive regulation of cell death                                                            | 8.73E-05 | 5.39E-03 |
| GO:0045892 | Negative regulation of transcription, DNA-dependent                                          | 9.42E-05 | 5.70E-03 |
| GO:0060348 | Bone development                                                                             | 9.45E-05 | 0.005594 |
| GO:0010629 | Negative regulation of gene expression                                                       | 9.94E-05 | 0.005761 |
| GO:0045893 | Positive regulation of transcription, DNA-dependent                                          | 1.21E-04 | 0.00687  |
| GO:0045860 | Positive regulation of protein kinase activity                                               | 1.27E-04 | 0.007088 |
| GO:0051253 | Negative regulation of RNA metabolic process                                                 | 1.28E-04 | 0.006991 |
| GO:0051726 | Regulation of cell cycle                                                                     | 1.33E-04 | 0.0071   |
| GO:0010628 | Positive regulation of gene expression                                                       | 1.35E-04 | 0.007072 |
| GO:0045941 | Positive regulation of transcription                                                         | 1.35E-04 | 0.006952 |
| GO:0051347 | Positive regulation of transferase activity                                                  | 1.48E-04 | 0.007476 |
| GO:0001503 | Ossification                                                                                 | 1.50E-04 | 0.007469 |
| GO:0032570 | Response to progesterone stimulus                                                            | 1.60E-04 | 0.007822 |
| GO:0045944 | Positive regulation of transcription from RNA polymerase II promoter                         | 1.91E-04 | 0.009167 |

---

<sup>1</sup>p-values were calculated using the Fischer's test.

<sup>2</sup>FDR corrections were calculated using the Benjamini-Hochberg procedure.
