# Supplementary material for: Helveticoside is a biologically active component of the seed extract of Descurainia sophia and induces reciprocal gene regulation in A549 human lung cancer cells
Source: PubMed Central journal article supplement (PMC4575430; doi:10.1186/s12864-015-1918-1), 2015-09-18
Supplement: 12864_2015_1918_MOESM15_ESM.pdf [file 12864_2015_1918_MOESM15_ESM.pdf]

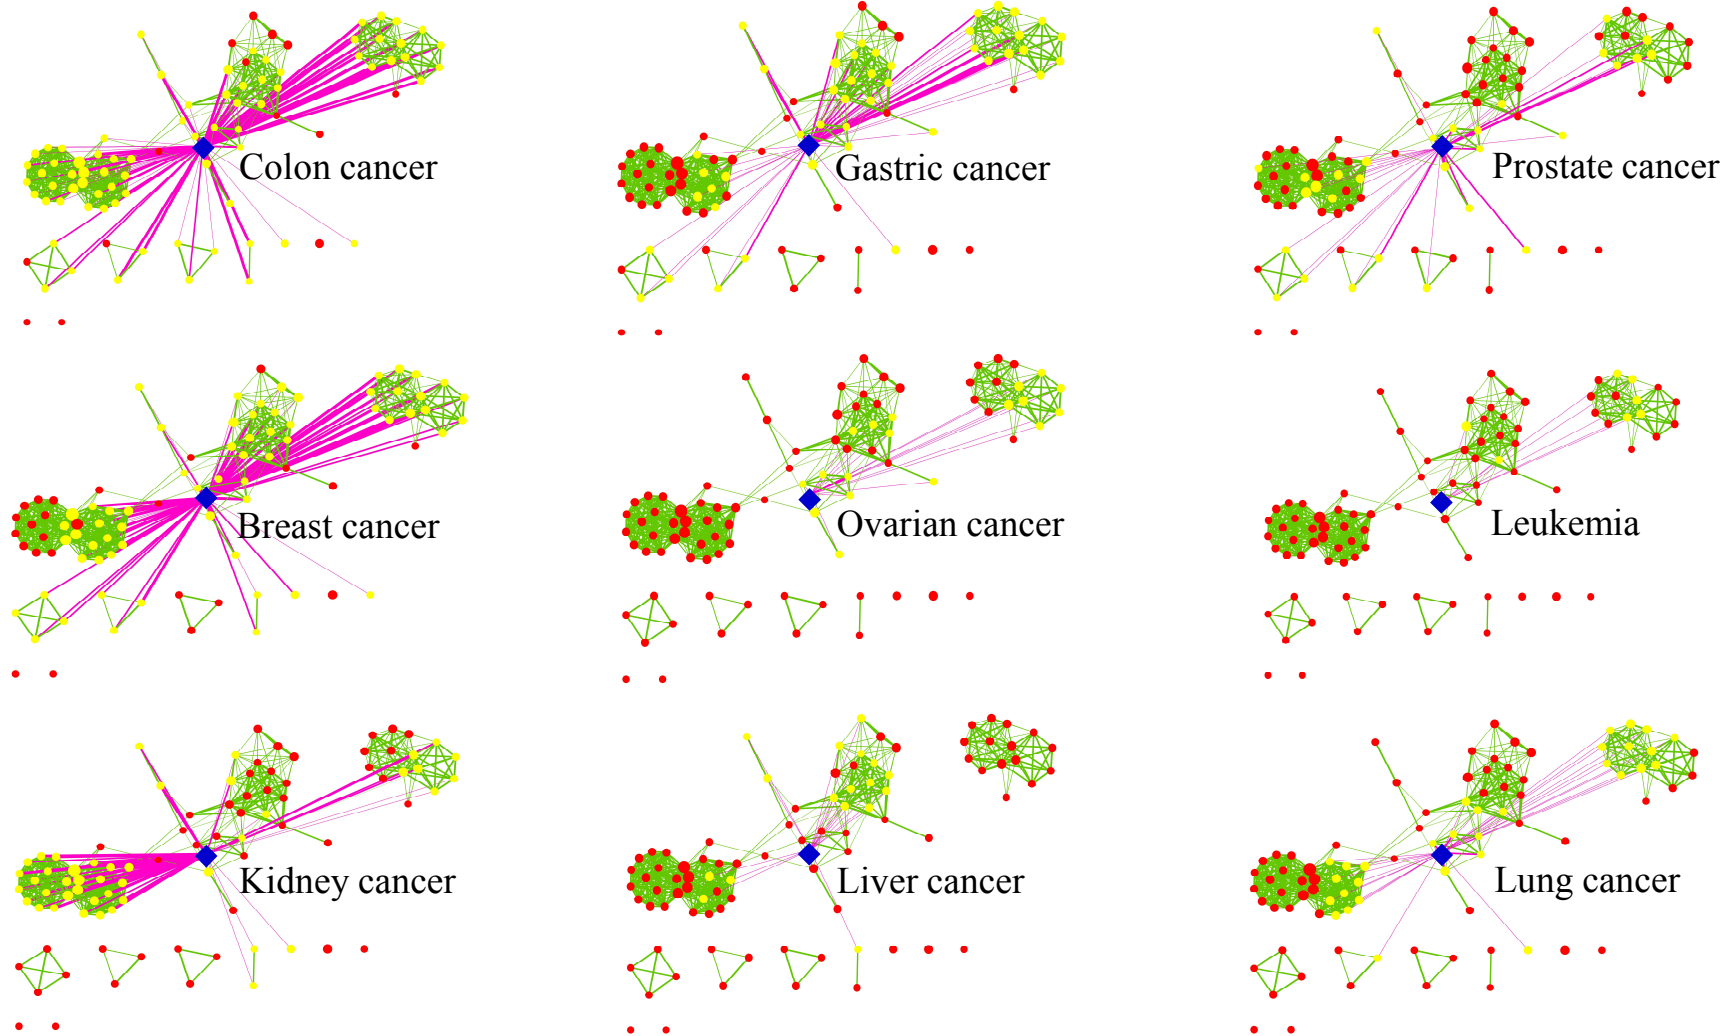

**Additional file 15. Association of GO terms with the cancer-related genes in the Enrichment map.** The association of GO terms with the cancer-related genes is shown, and the blue diamond in the center represents the cancer-related genes obtained from the DiseaseHub database. A yellow node indicates a GO term with cancer-related genes, and the thickness of the purple edge is proportional to the number of genes.
